# Supplementary material for: De novo protecting-group-free total synthesis of (+)-muricadienin, (+)-ancepsenolide and (+)-3-hexadecyl-5-methylfuran-2(5H)-one
Source: Royal Society of Chemistry journal article supplement (doi:10.1039/c6ob01721e), 2016-01-01

***De Novo Protecting-Group-Free Total Synthesis of (+)-  
Muricadienin (+)-Ancepsenolide and (+)-3-Hexadesyl-5-  
methylofuran-2(5H)-one***

Rupesh A. Kunkalkar, Debasish Laha and Rodney A. Fernandes\*

Department of Chemistry, Indian Institute of Technology Bombay  
Powai, Mumbai 400 076, Maharashtra (India)  
E-mail: [rfernand@chem.iitb.ac.in](mailto:rfernand@chem.iitb.ac.in)

**Table of Contents**

<sup>1</sup>H NMR, <sup>13</sup>C NMR of all compounds ..... S2-S17

<sup>1</sup>H NMR (400 MHz, CDCl<sub>3</sub>/TMS) and <sup>13</sup>C NMR (100 MHz, CDCl<sub>3</sub>) of compound 5

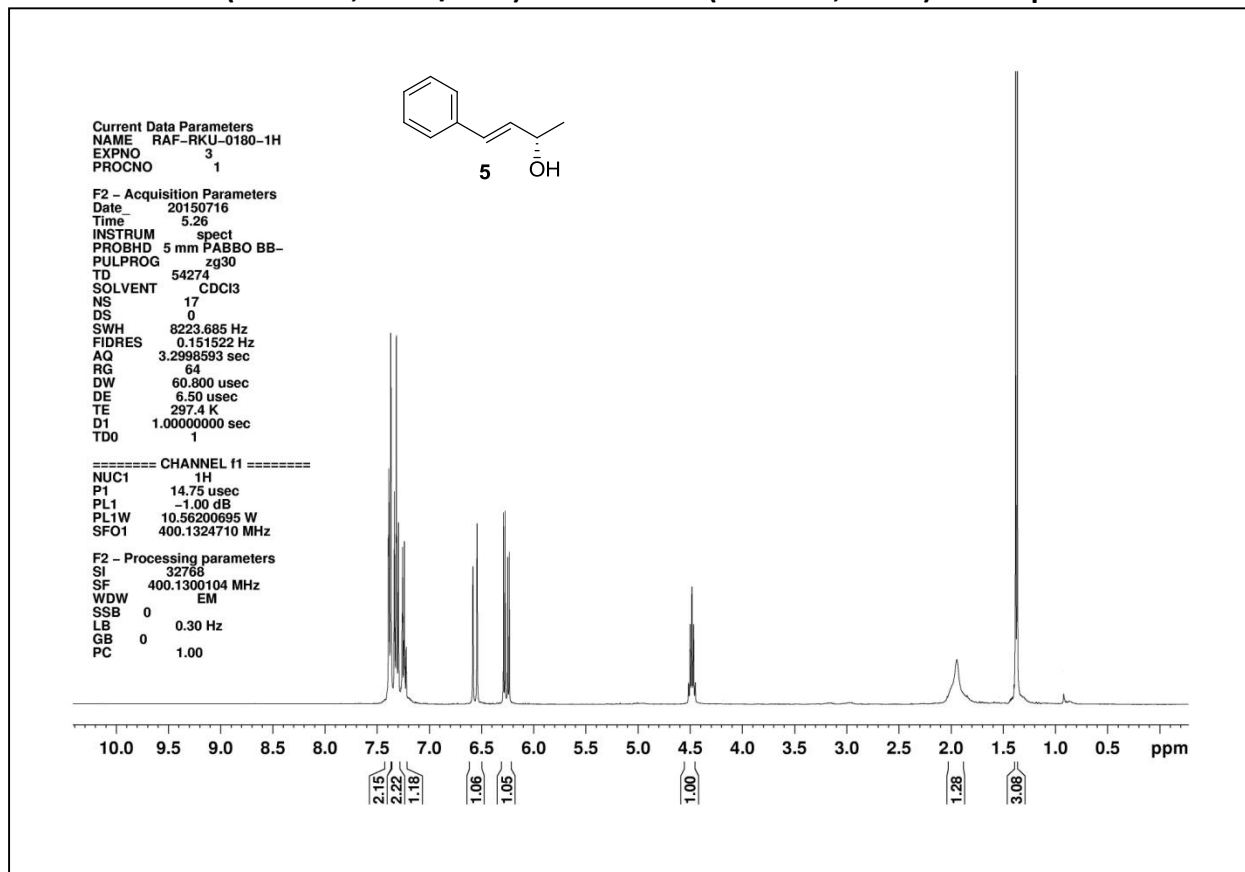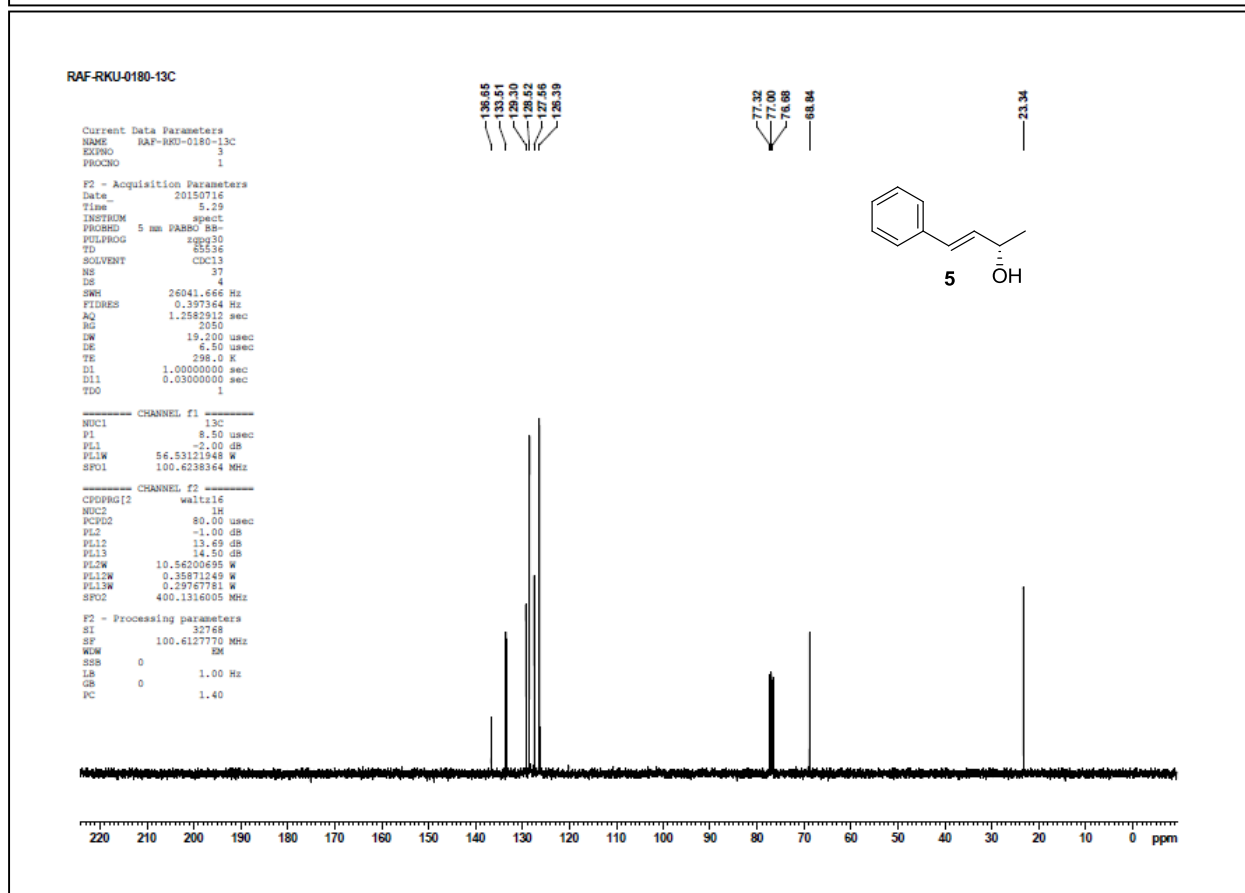

<sup>1</sup>H NMR (400 MHz, CDCl<sub>3</sub>/TMS) and <sup>13</sup>C NMR (100 MHz, CDCl<sub>3</sub>) of compound 6

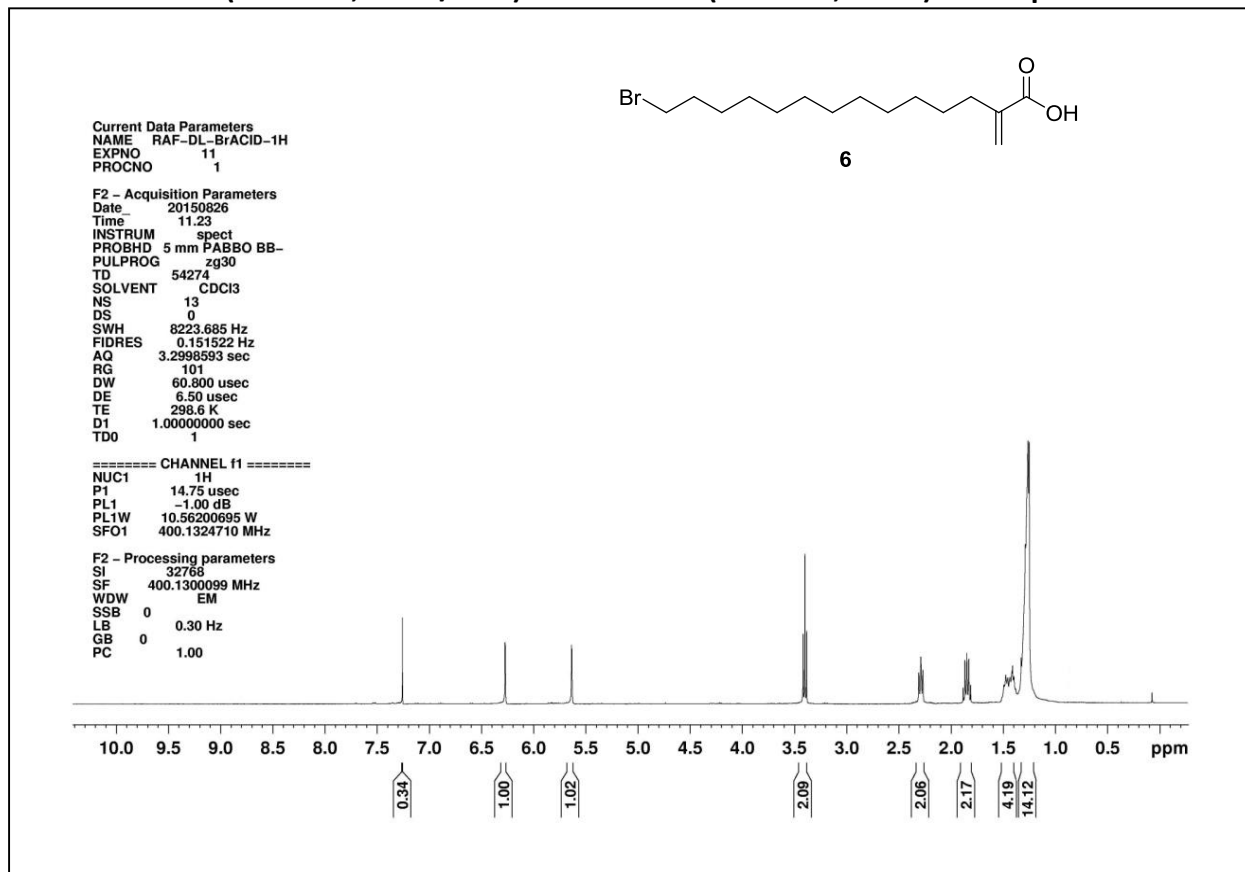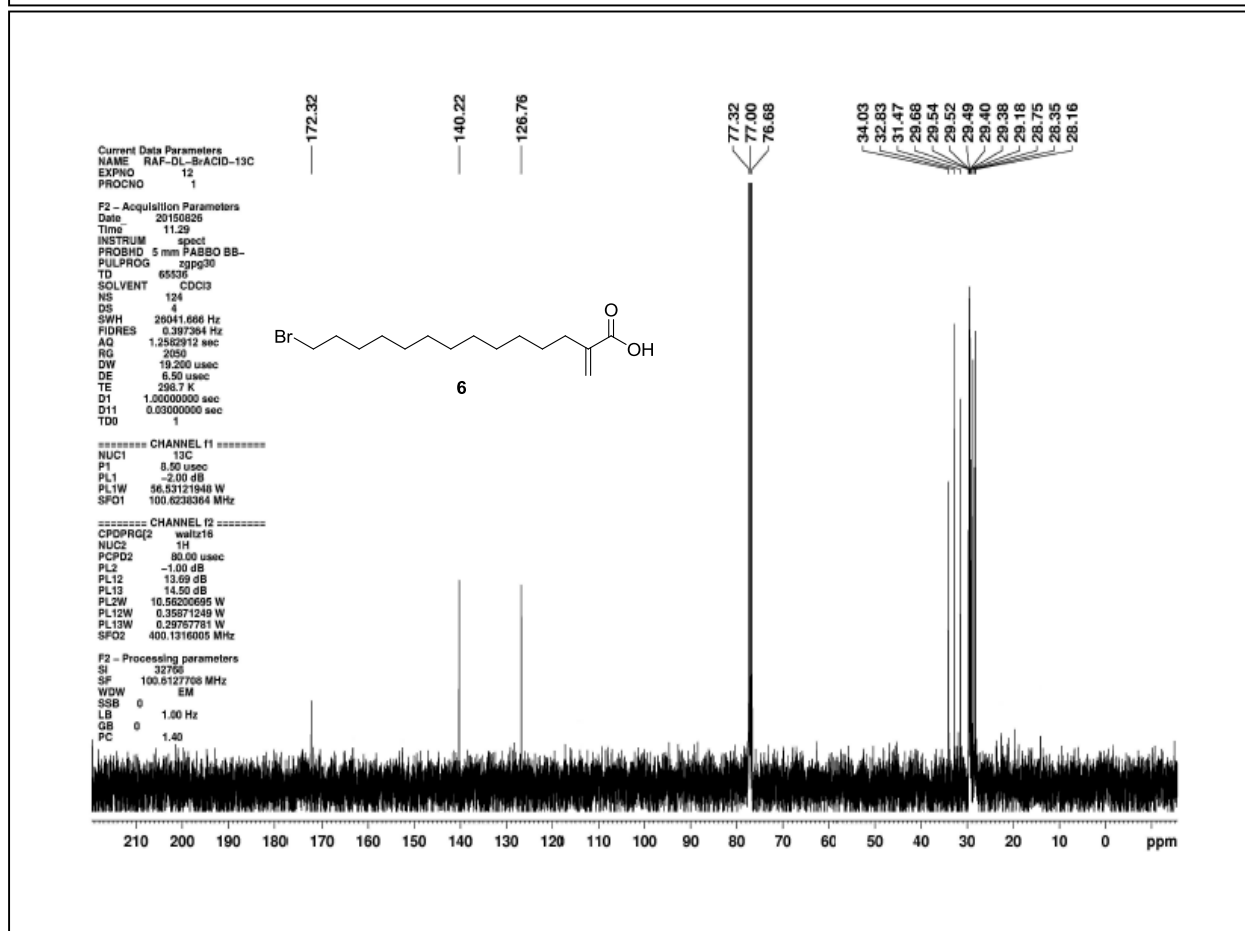

<sup>1</sup>H NMR (400 MHz, CDCl<sub>3</sub>/TMS) and <sup>13</sup>C NMR (100 MHz, CDCl<sub>3</sub>) of compound 8

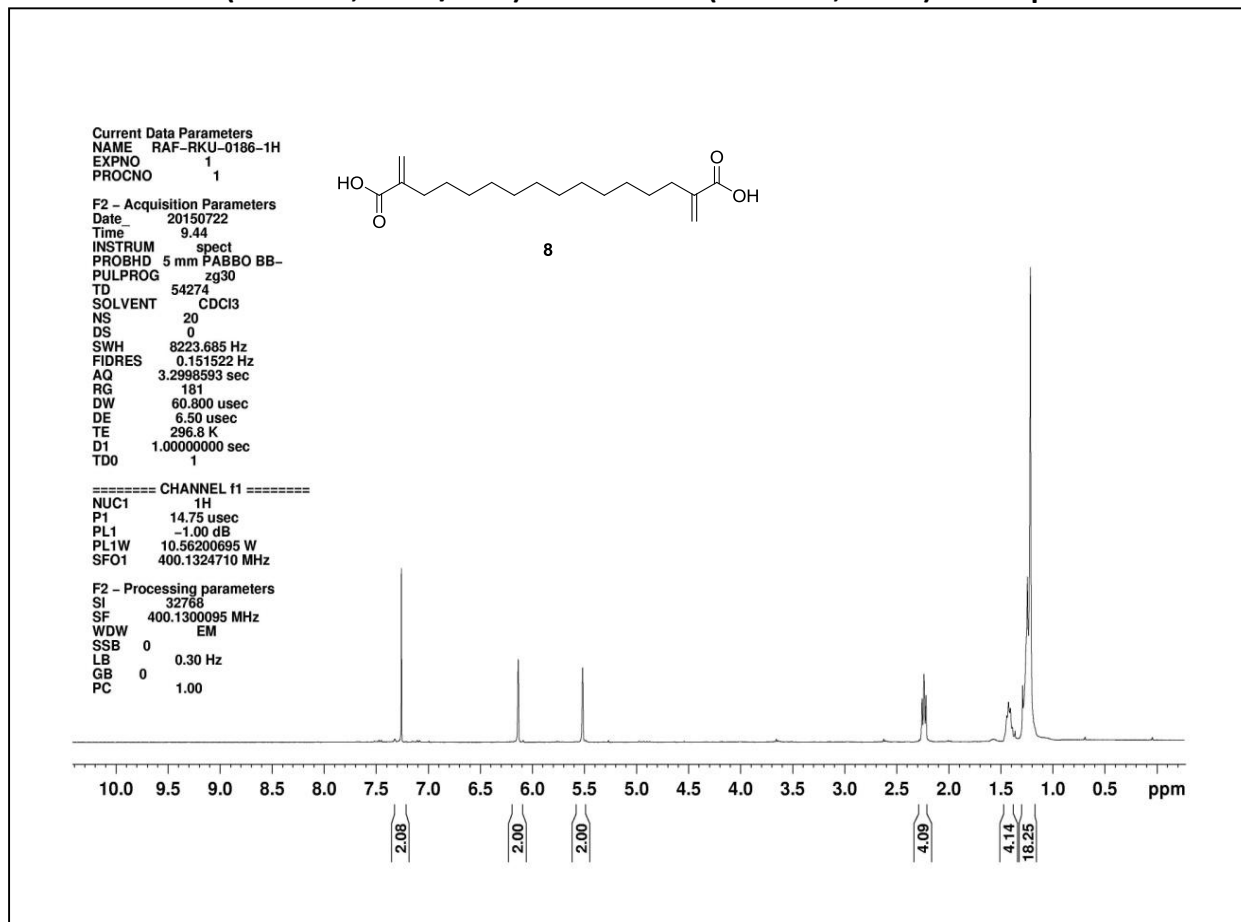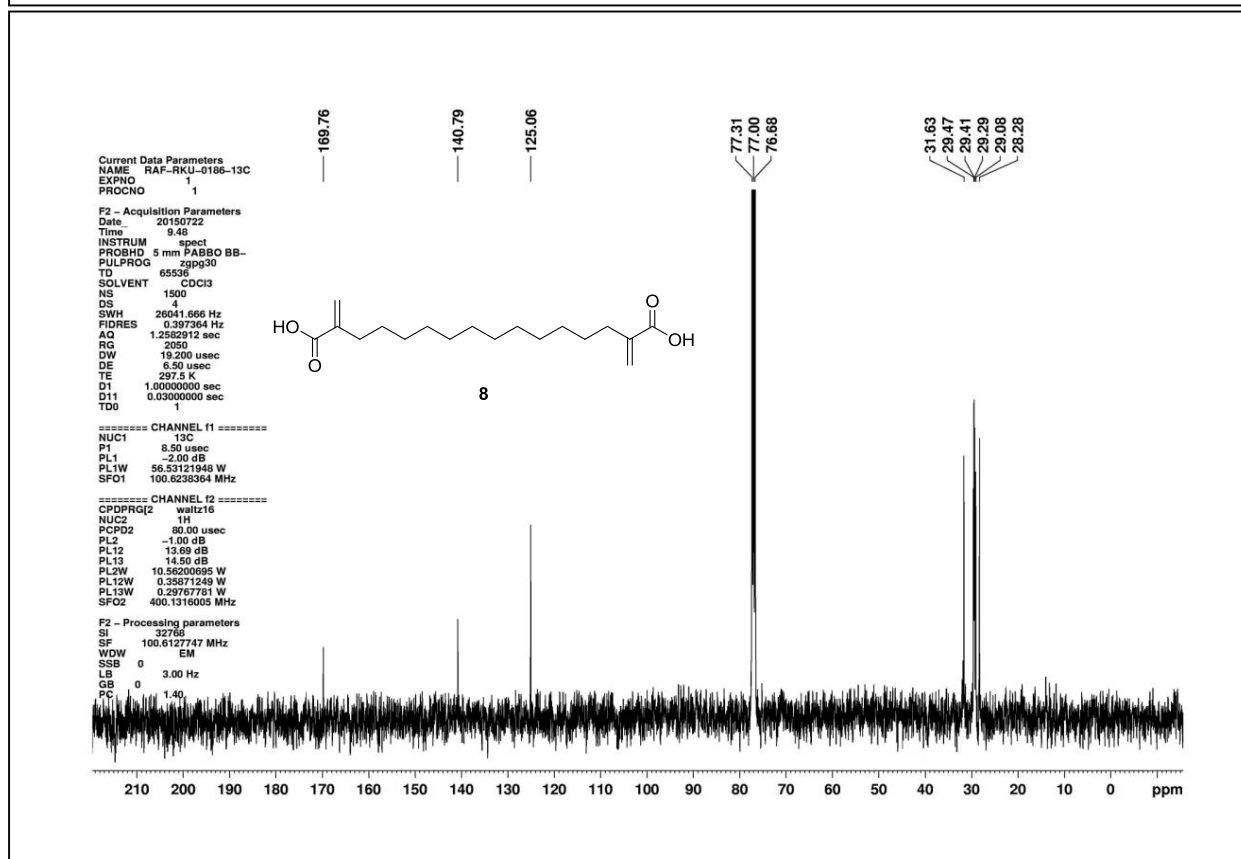

<sup>1</sup>H NMR (400 MHz, CDCl<sub>3</sub>/TMS) and <sup>13</sup>C NMR (100 MHz, CDCl<sub>3</sub>) of compound 9

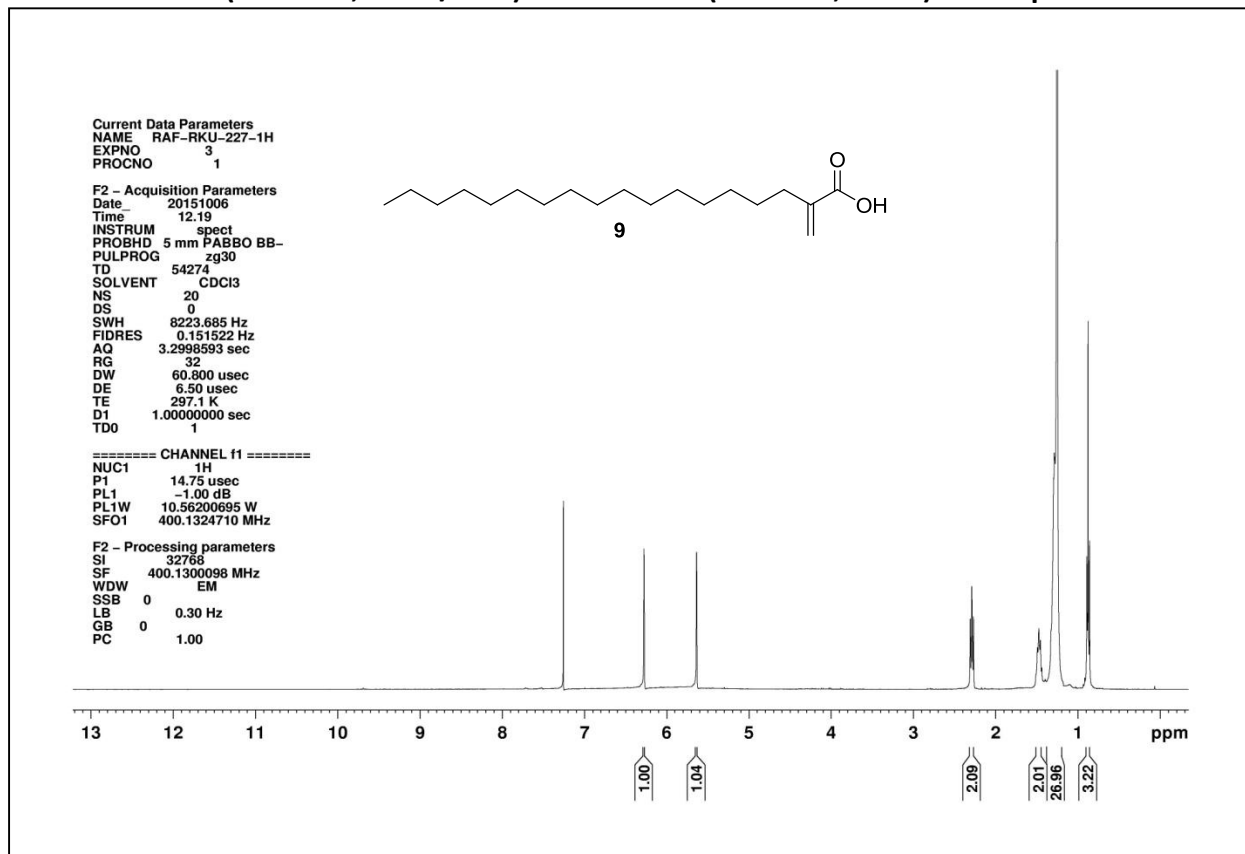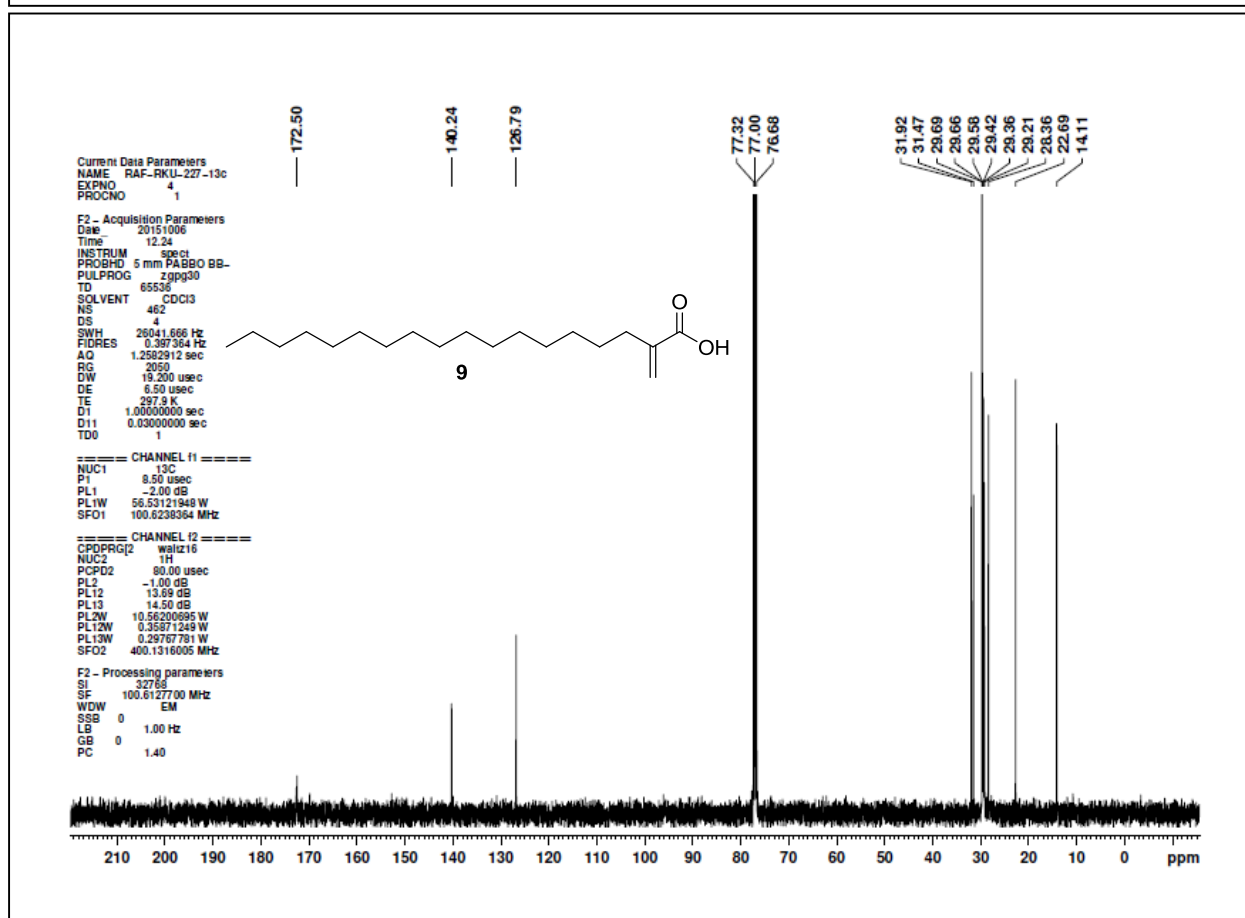

<sup>1</sup>H NMR (500 MHz, CDCl<sub>3</sub>/TMS) and <sup>13</sup>C NMR (125 MHz, CDCl<sub>3</sub>) of compound 13

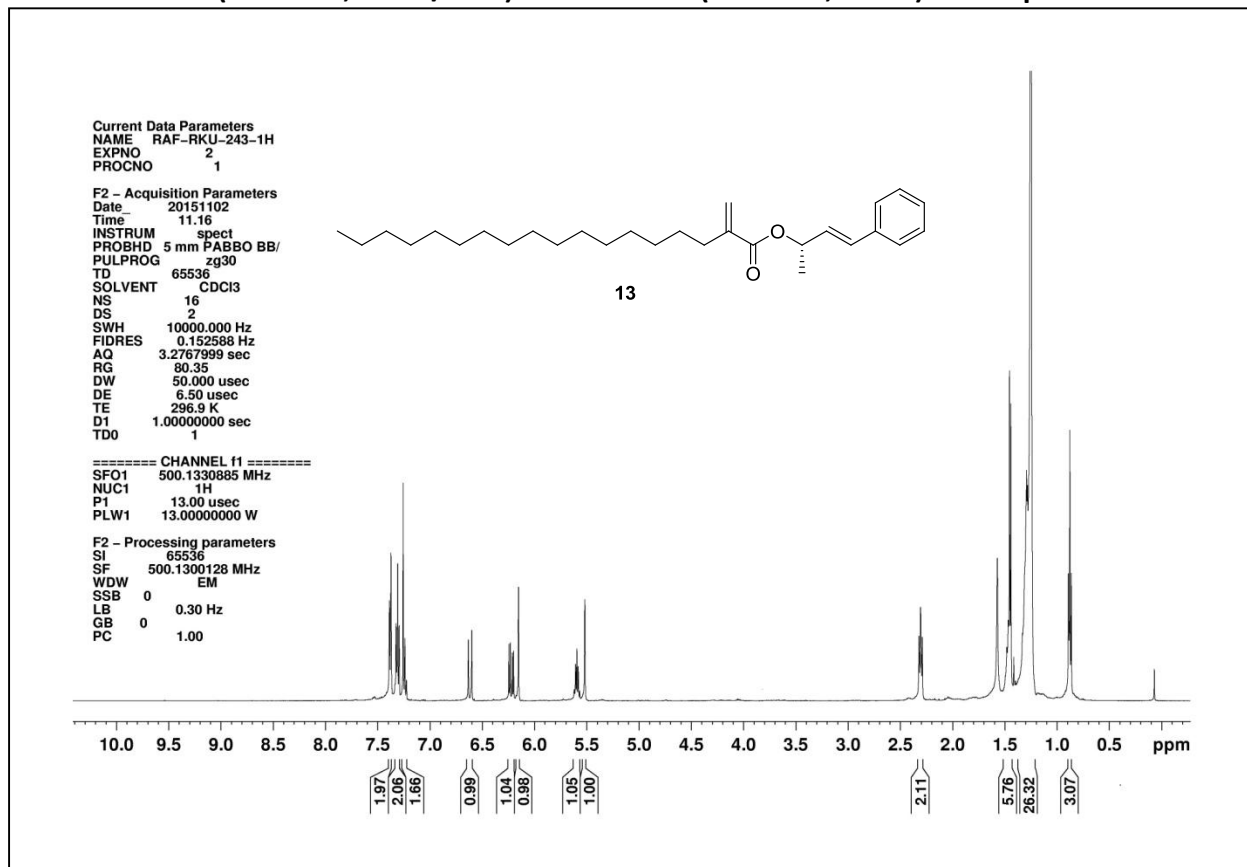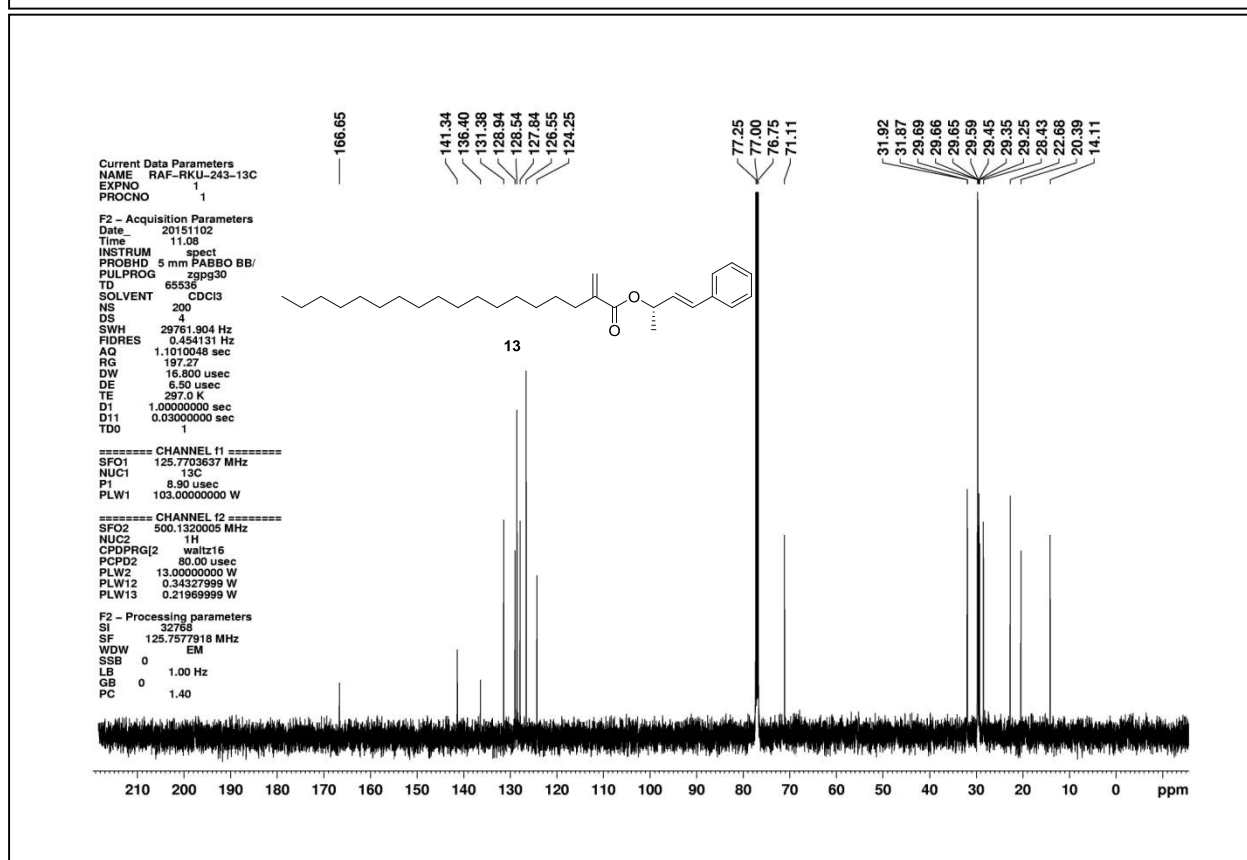

<sup>1</sup>H NMR (400 MHz, CDCl<sub>3</sub>/TMS) comparison with literature data of compound 4

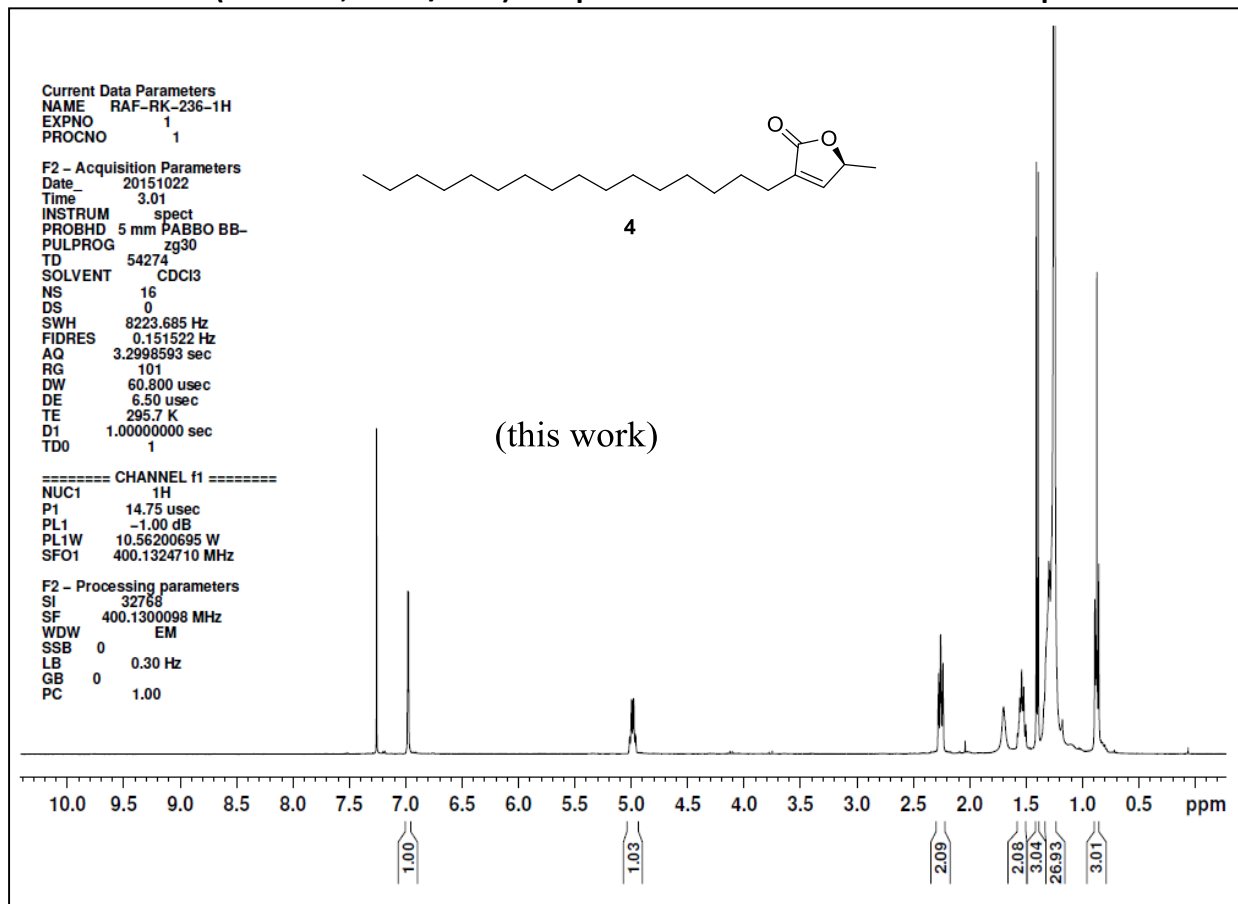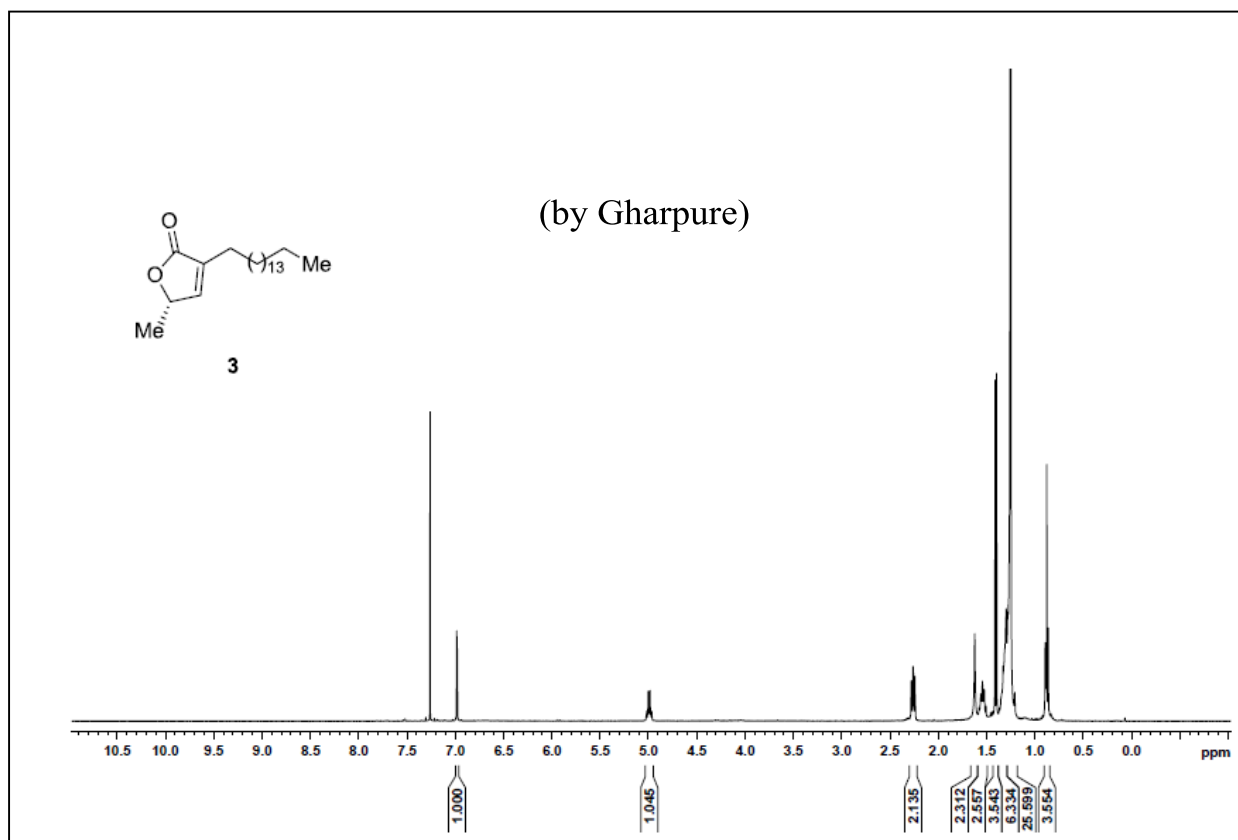

<sup>13</sup>C NMR (100 MHz, CDCl<sub>3</sub>) and comparison with literature data of compound 4

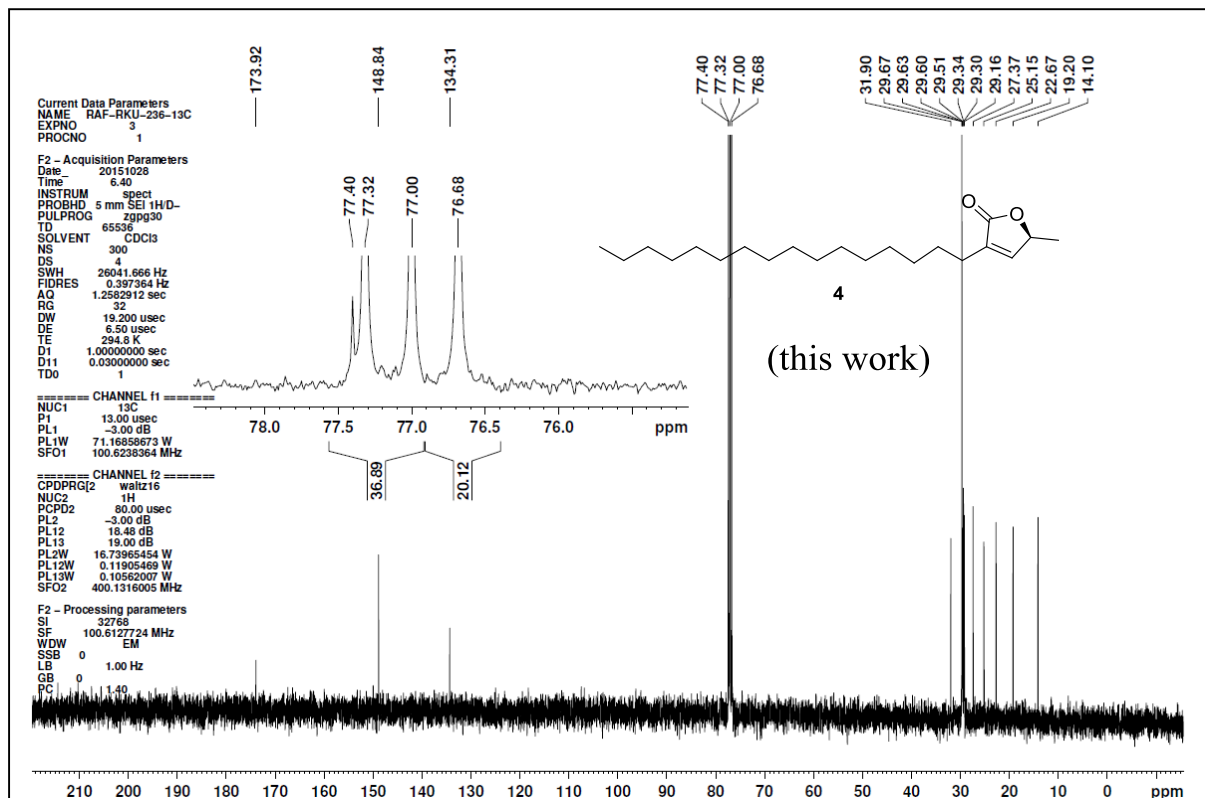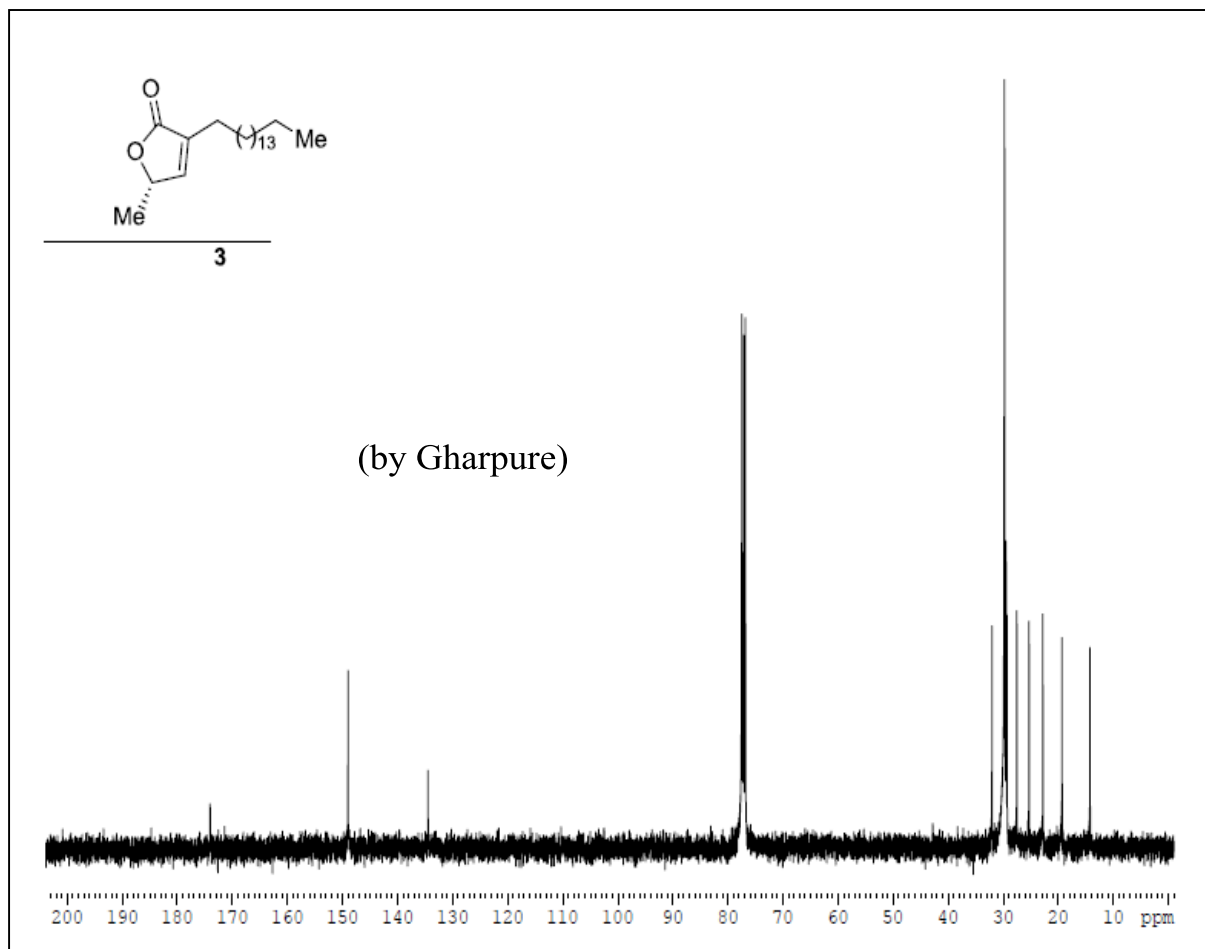



<sup>1</sup>H NMR (500 MHz, CDCl<sub>3</sub>/TMS) and <sup>13</sup>C NMR (125 MHz, CDCl<sub>3</sub>) of compound 14

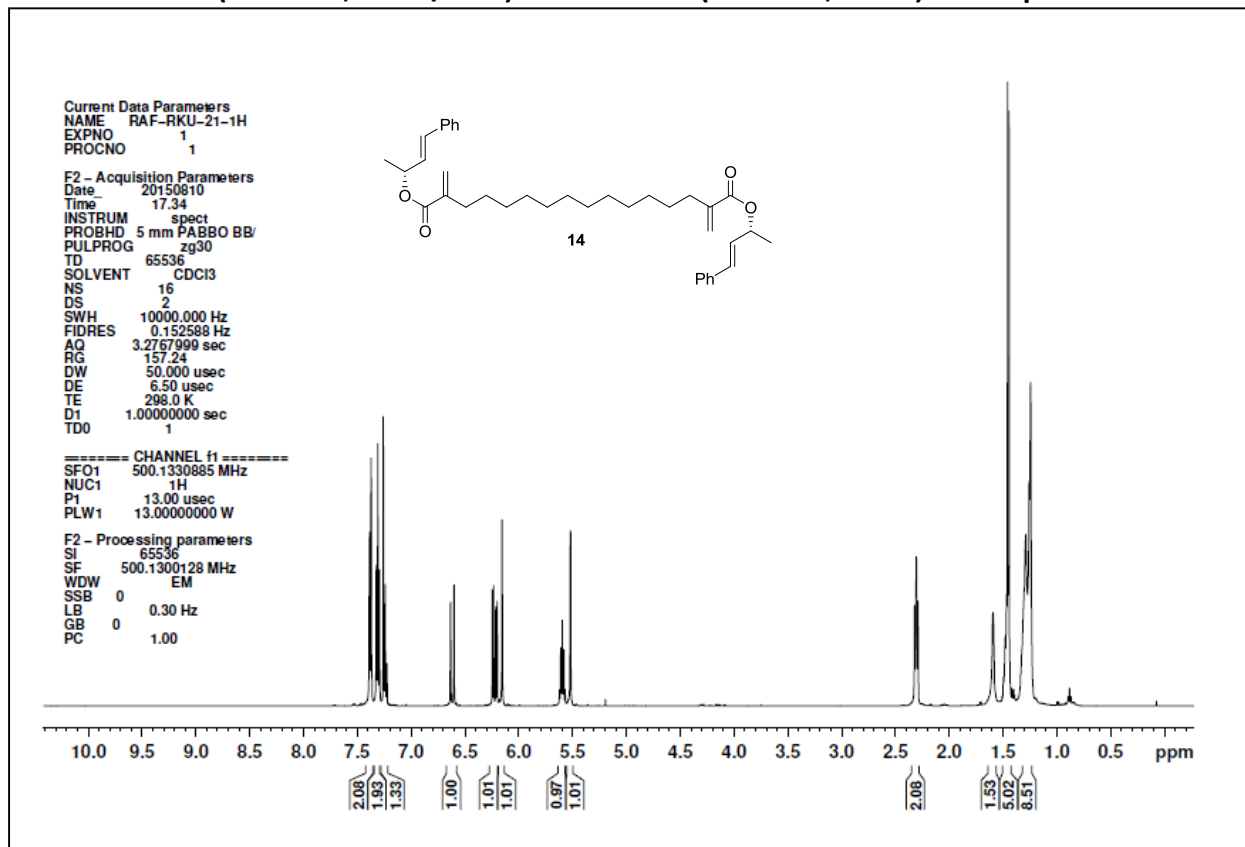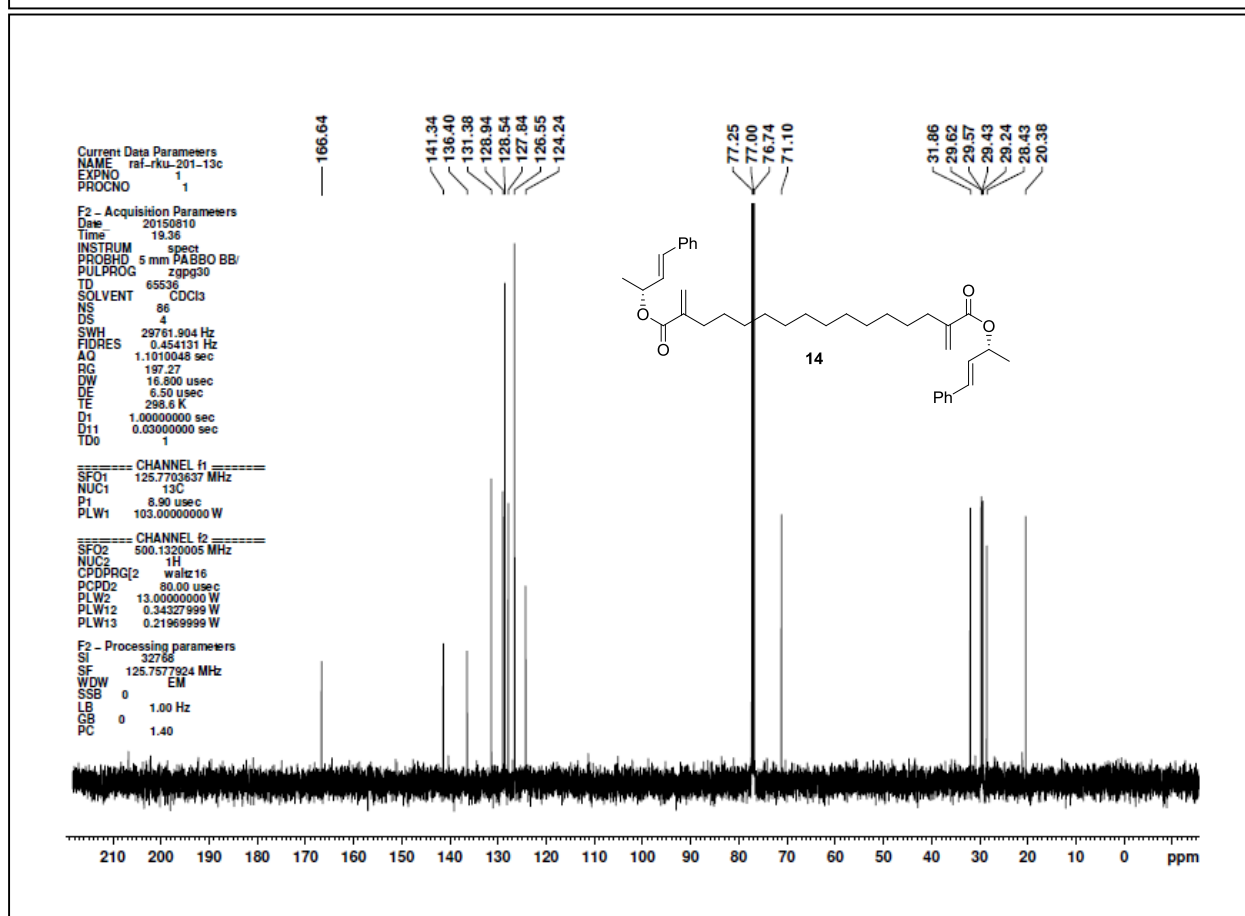

<sup>1</sup>H NMR (400 MHz, CDCl<sub>3</sub>/TMS) and comparison with literature data of compound 3

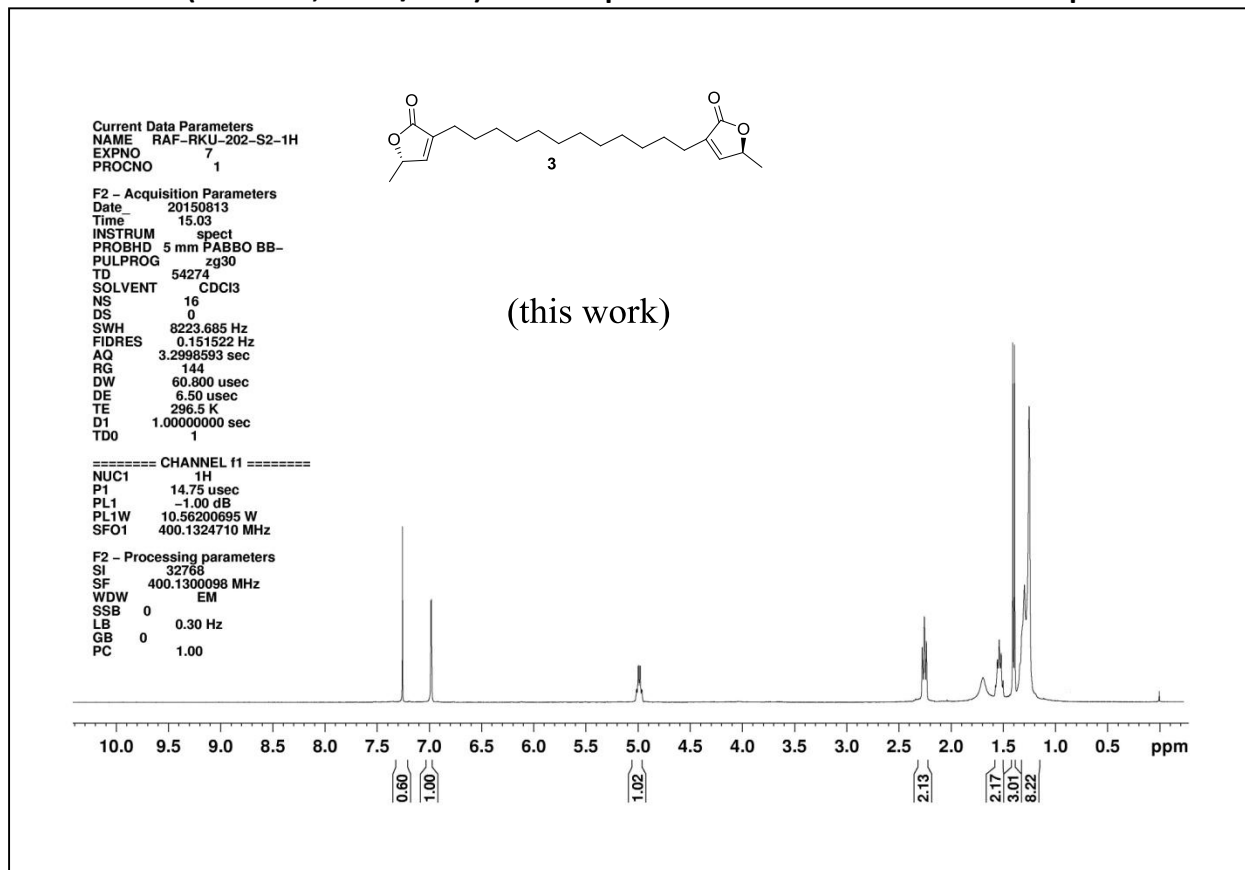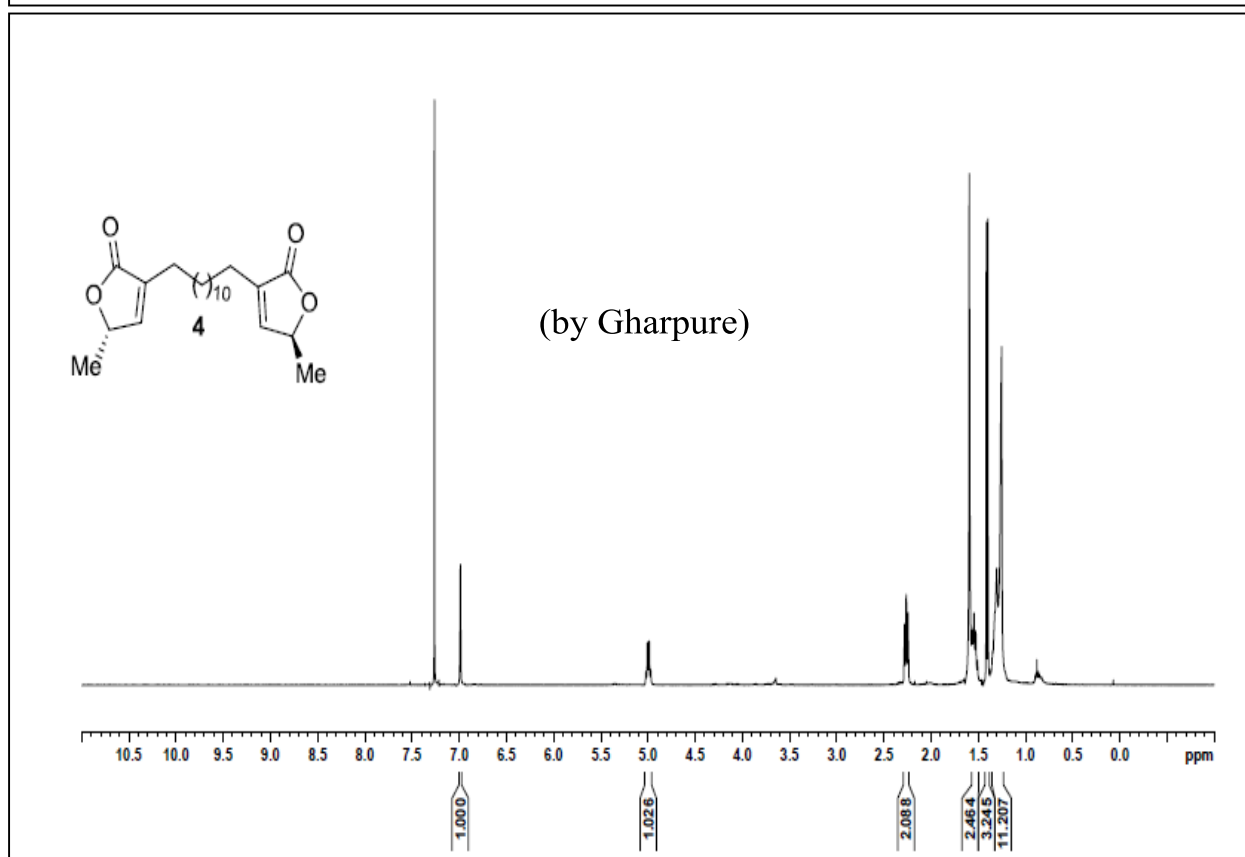

**<sup>13</sup>C NMR (100 MHz, CDCl<sub>3</sub>) and comparison with literature data of compound 3**

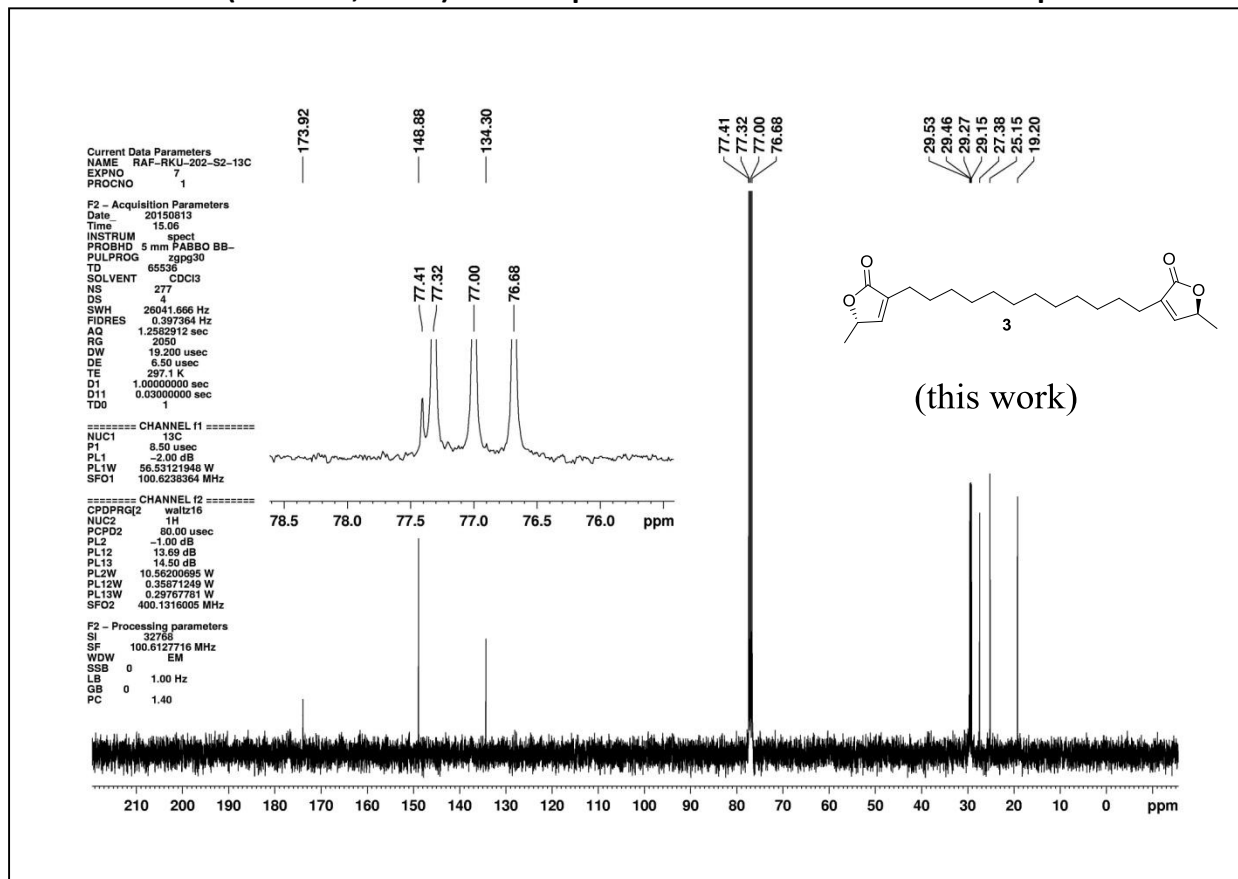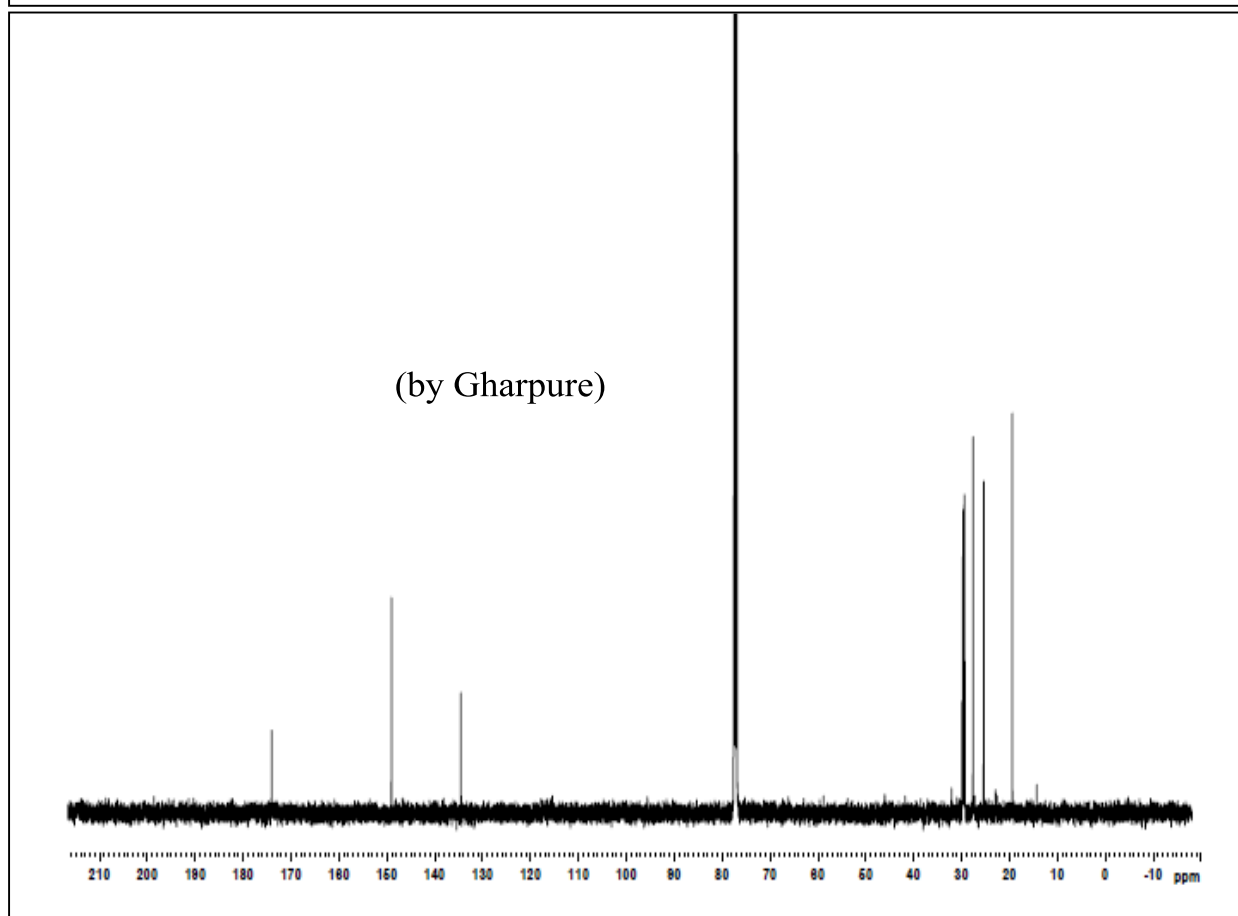

<sup>1</sup>H NMR (500 MHz, CDCl<sub>3</sub>/TMS) and <sup>13</sup>C NMR (125 MHz, CDCl<sub>3</sub>) of compound 7

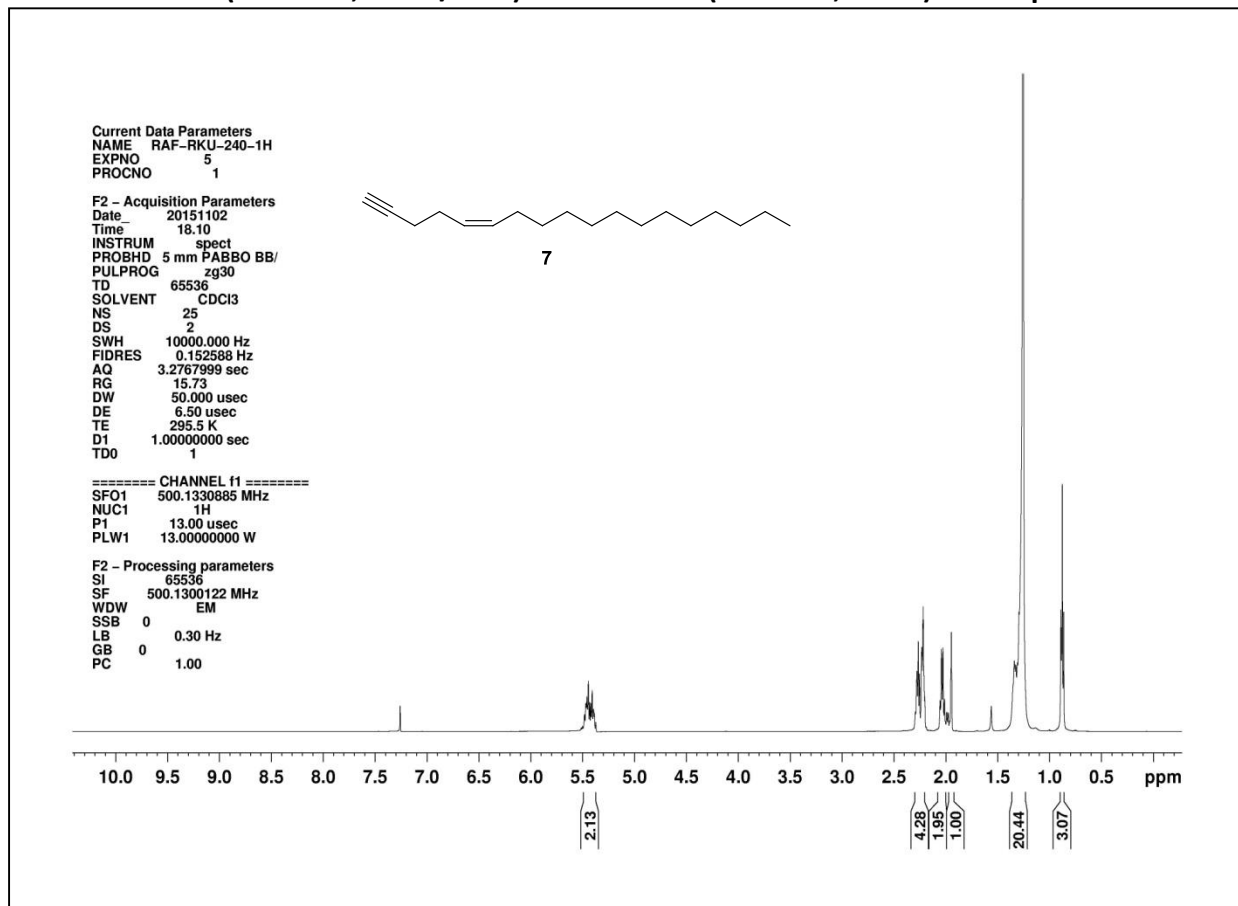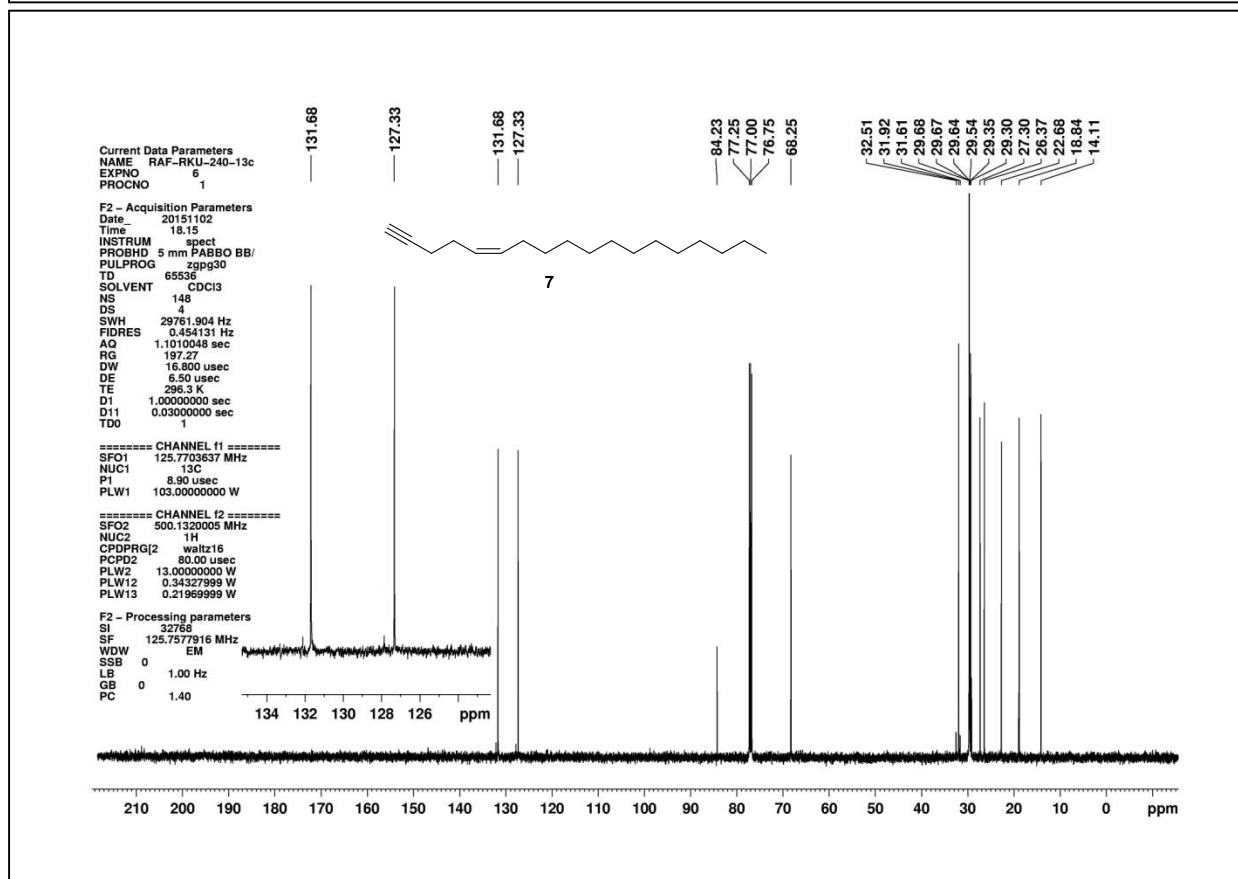

<sup>1</sup>H NMR (400 MHz, CDCl<sub>3</sub>/TMS) and <sup>13</sup>C NMR (100 MHz, CDCl<sub>3</sub>) of compound 18

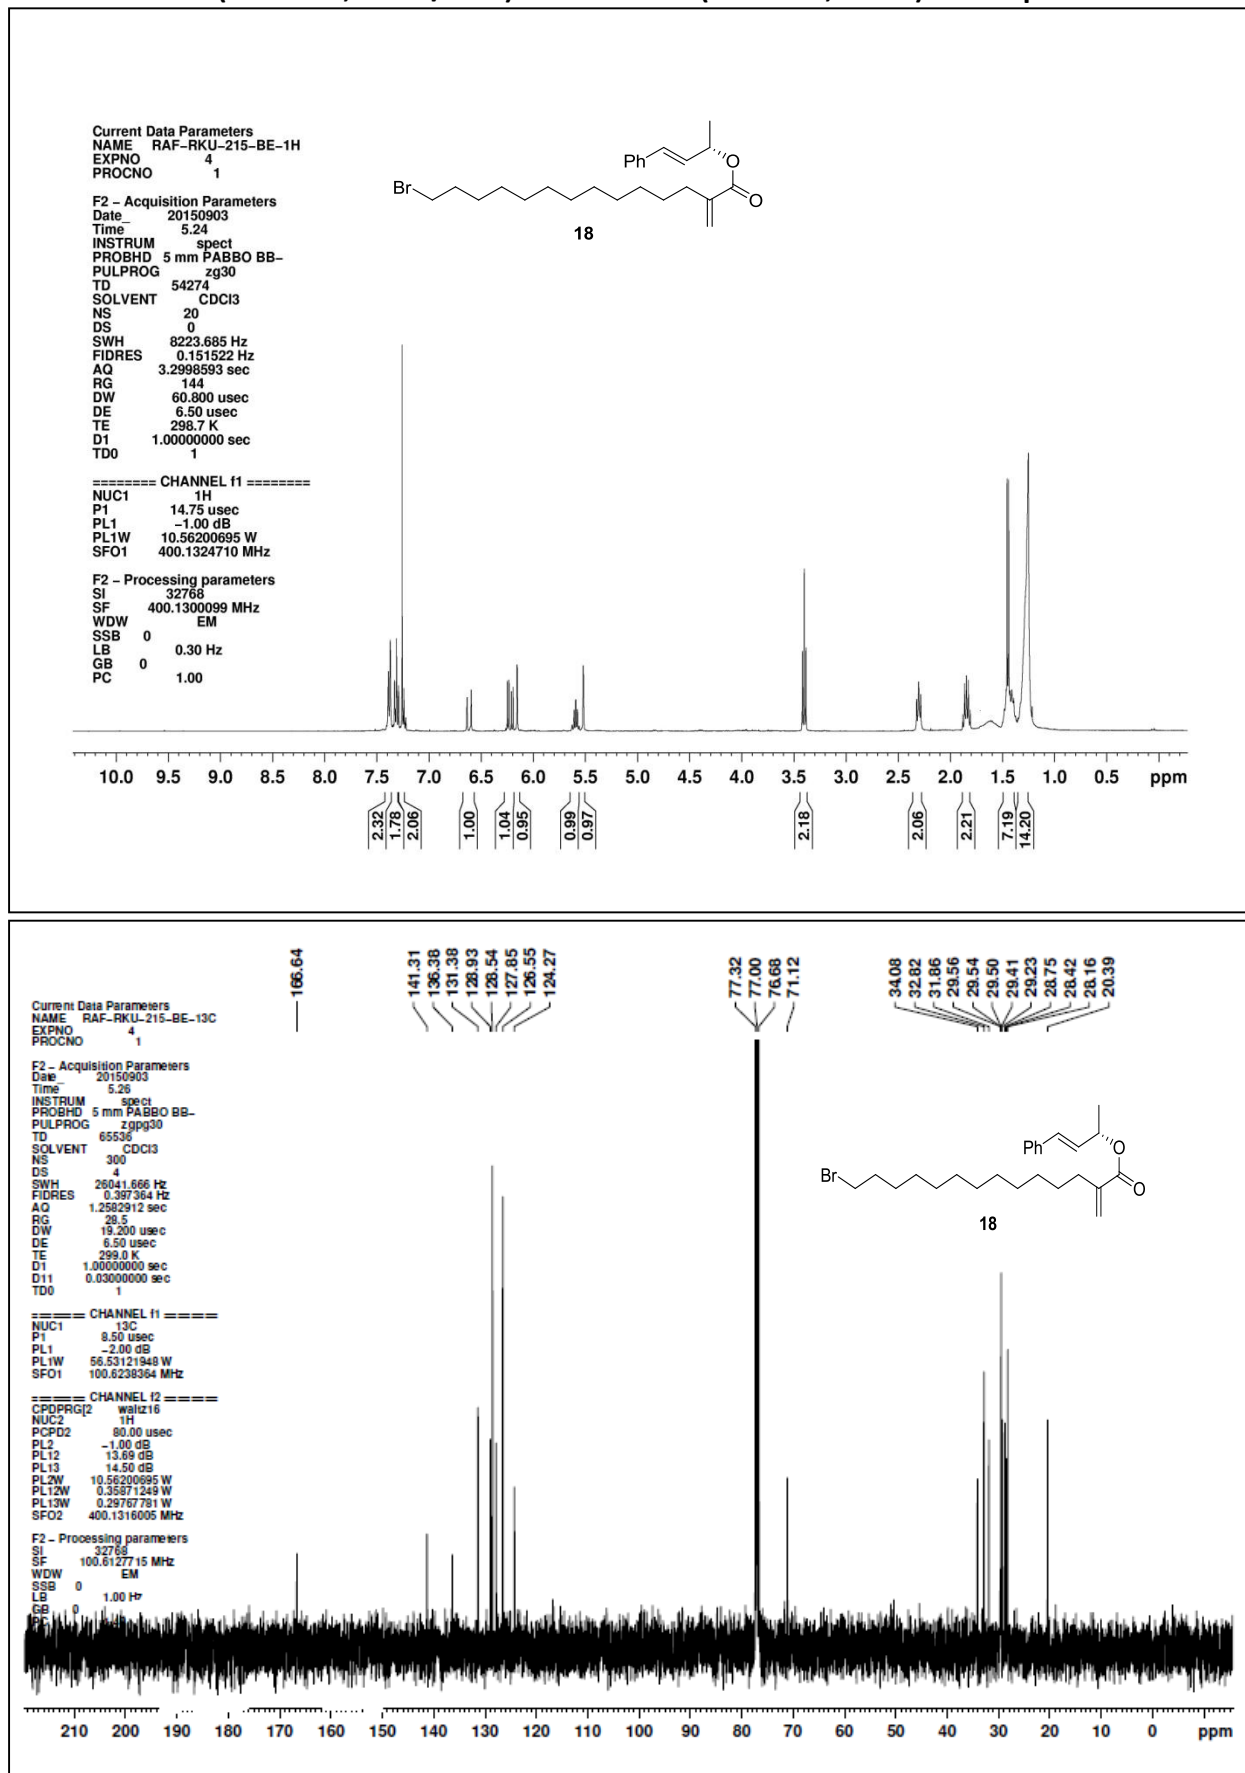

$^1\text{H}$  NMR (500 MHz,  $\text{CDCl}_3/\text{TMS}$ ) and  $^{13}\text{C}$  NMR (125 MHz,  $\text{CDCl}_3$ ) of compound 19

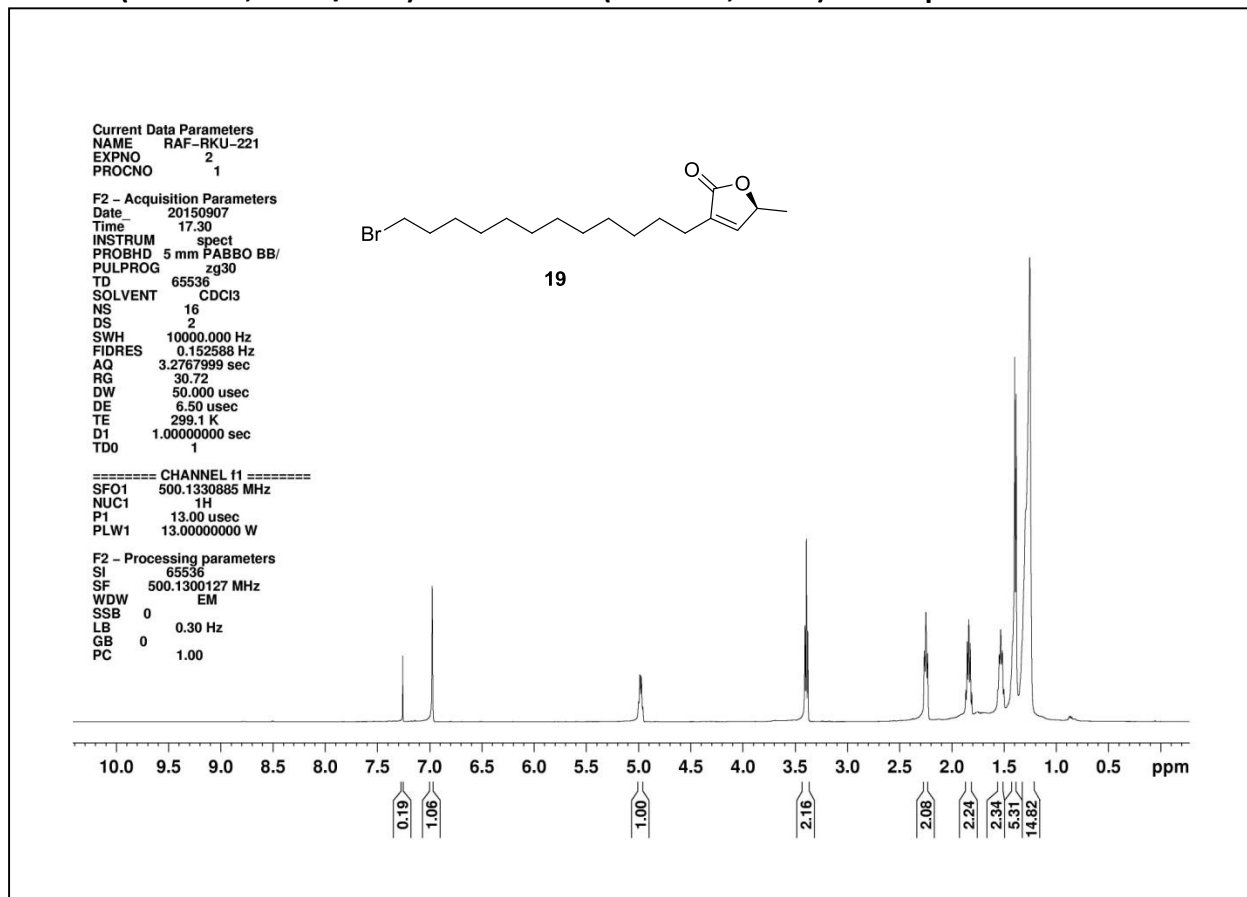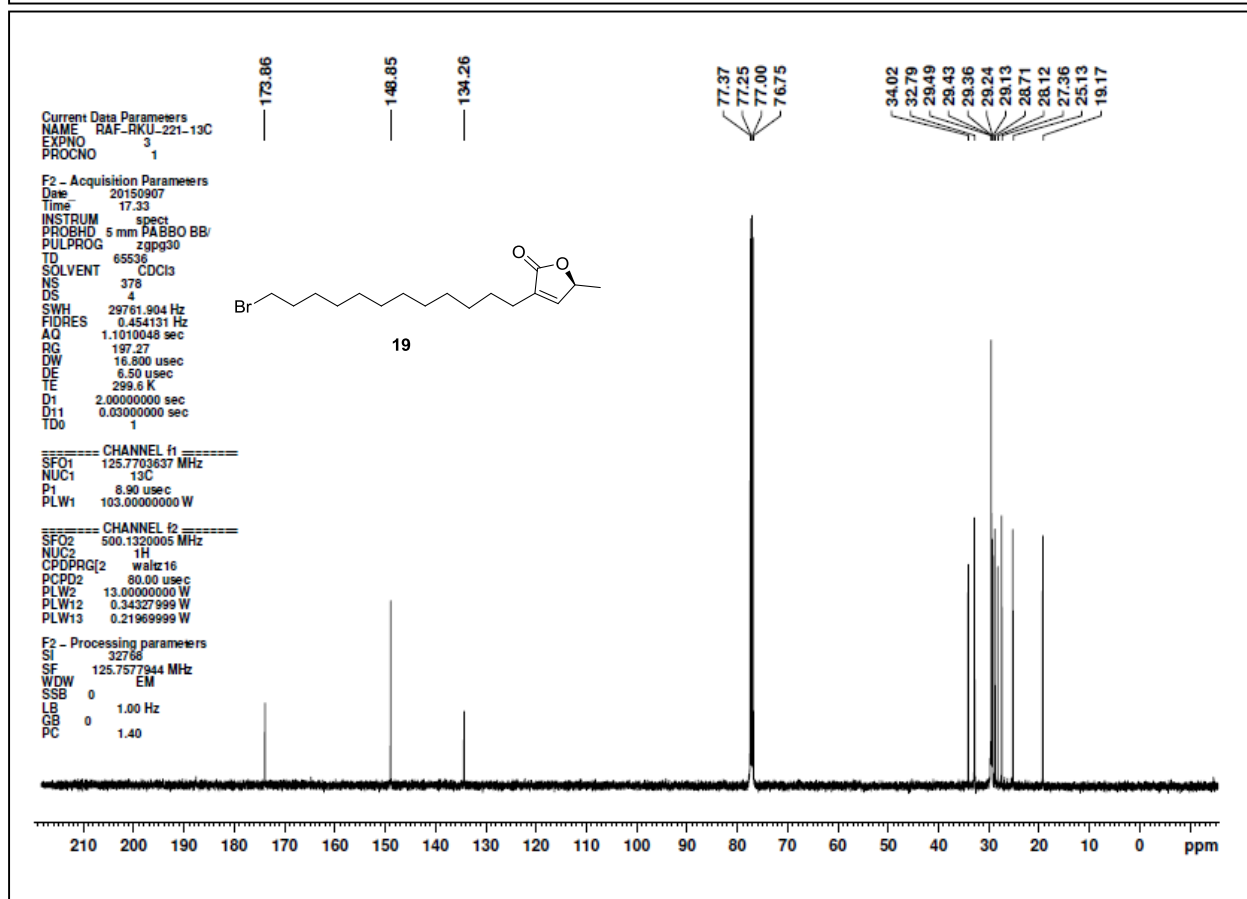

$^1\text{H}$  NMR (400 MHz,  $\text{CDCl}_3/\text{TMS}$ ) and  $^{13}\text{C}$  NMR (100 MHz,  $\text{CDCl}_3$ ) of compound 20

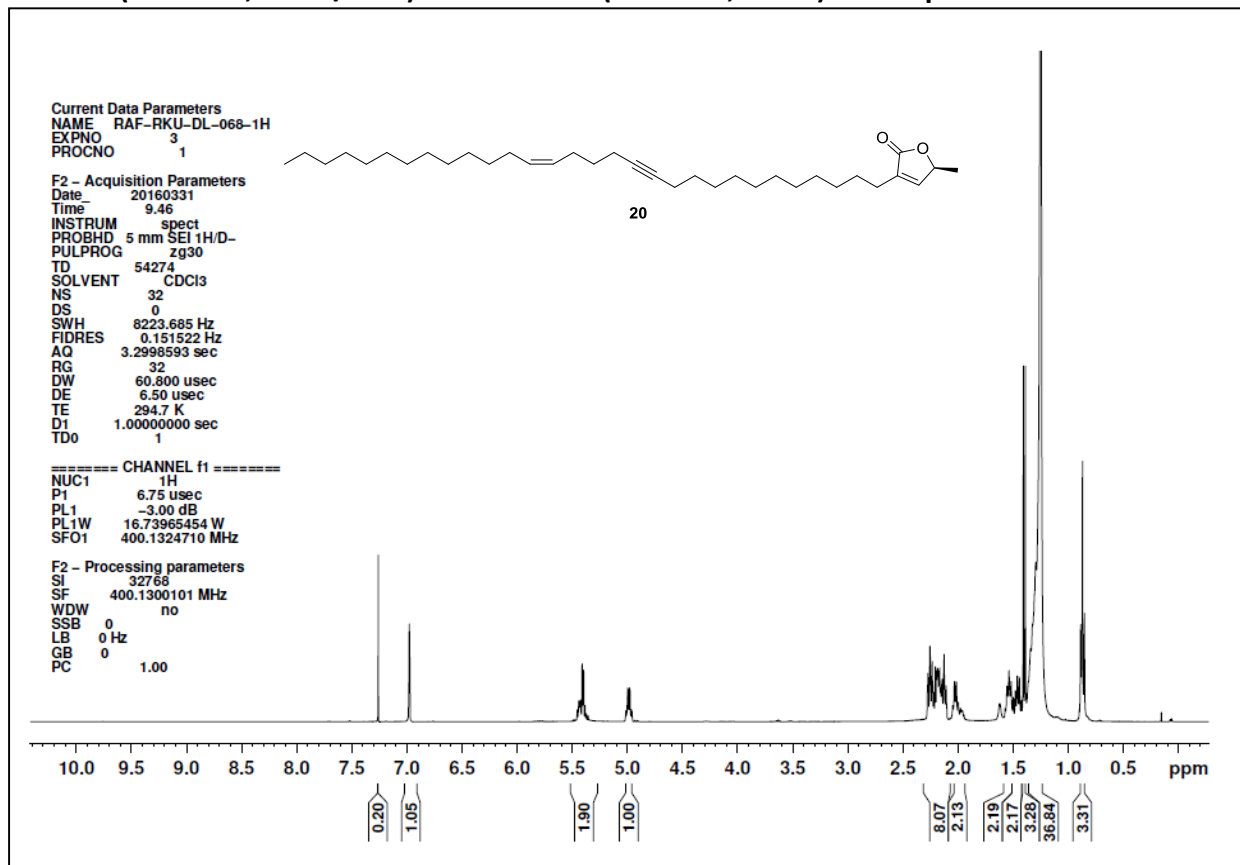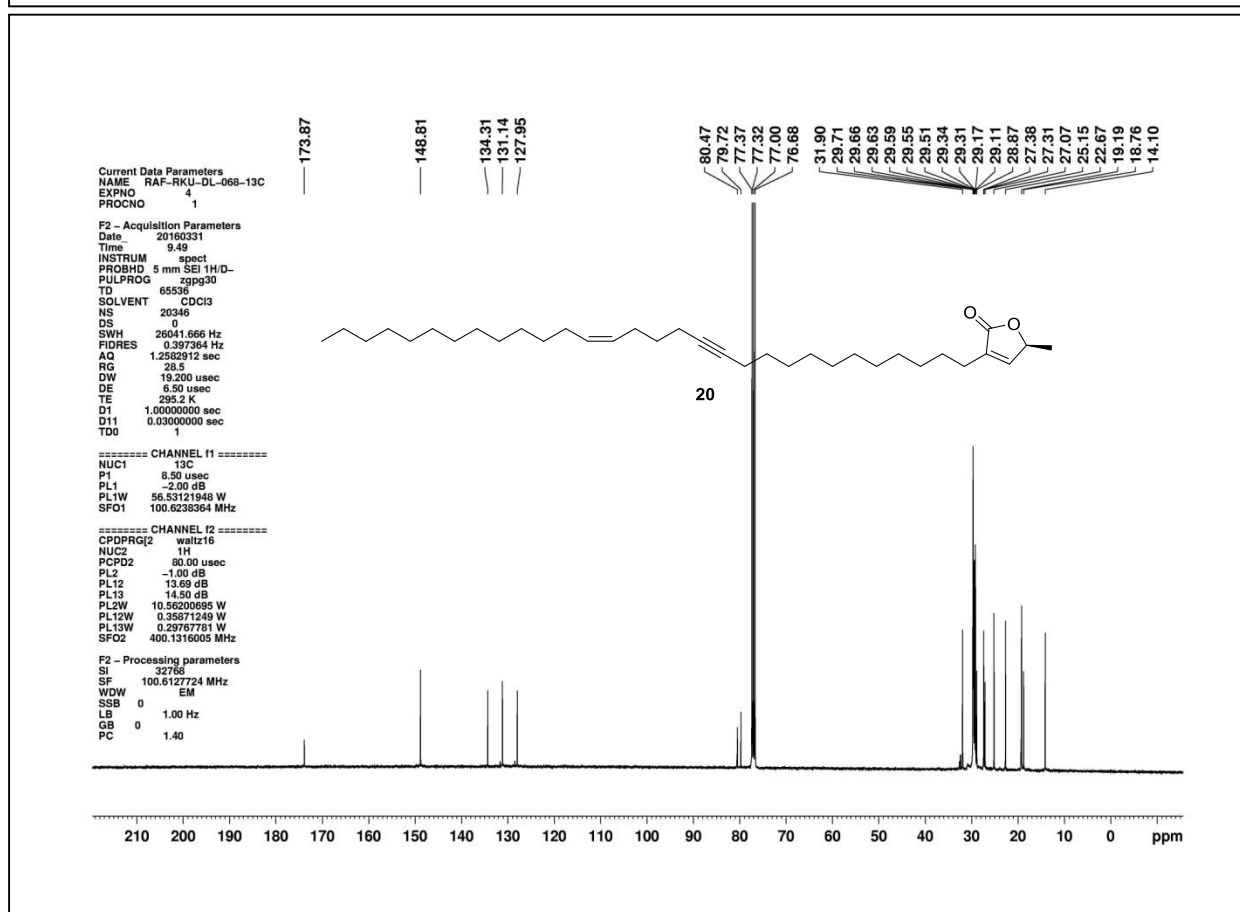

<sup>1</sup>H NMR (500 MHz, CDCl<sub>3</sub>/TMS) and comparison with literature data of compound 2

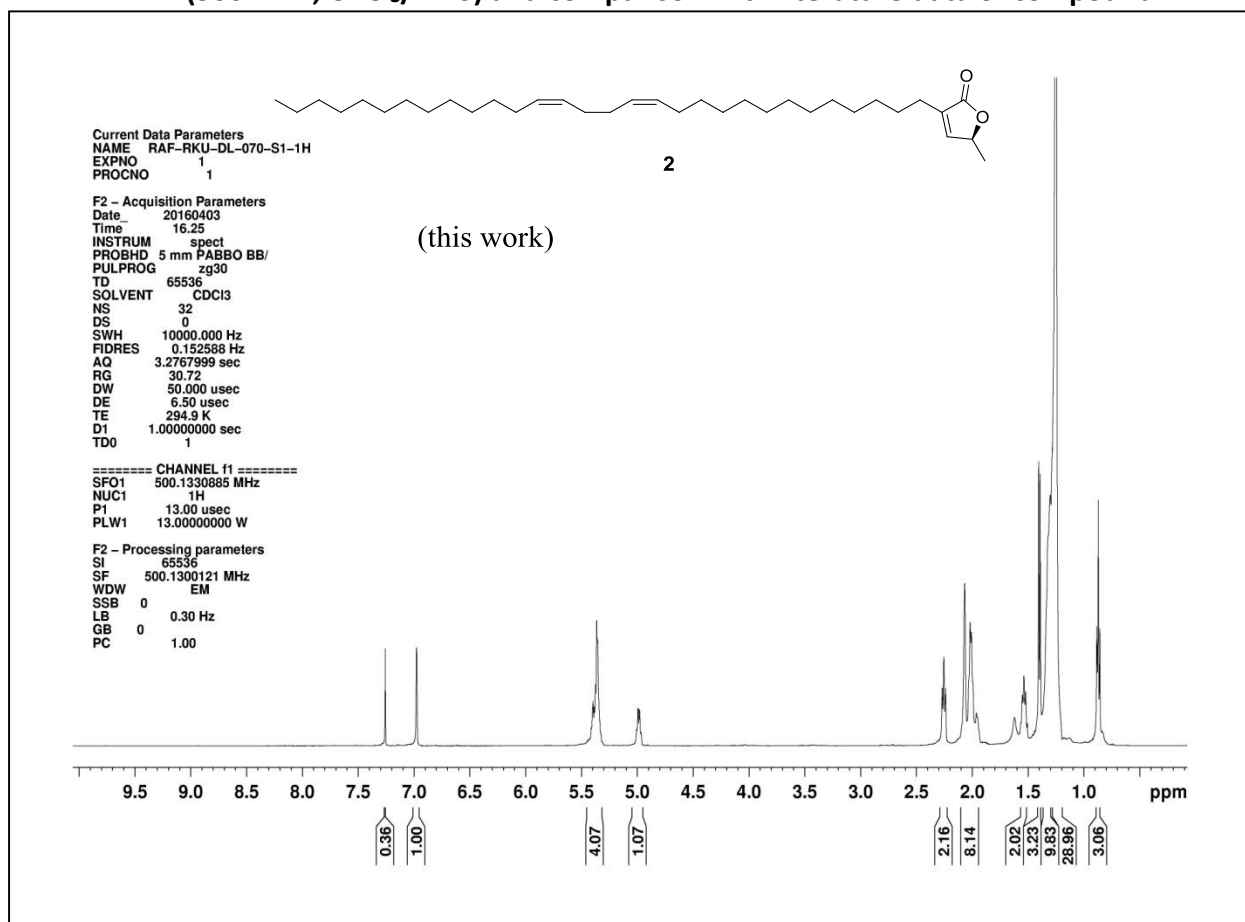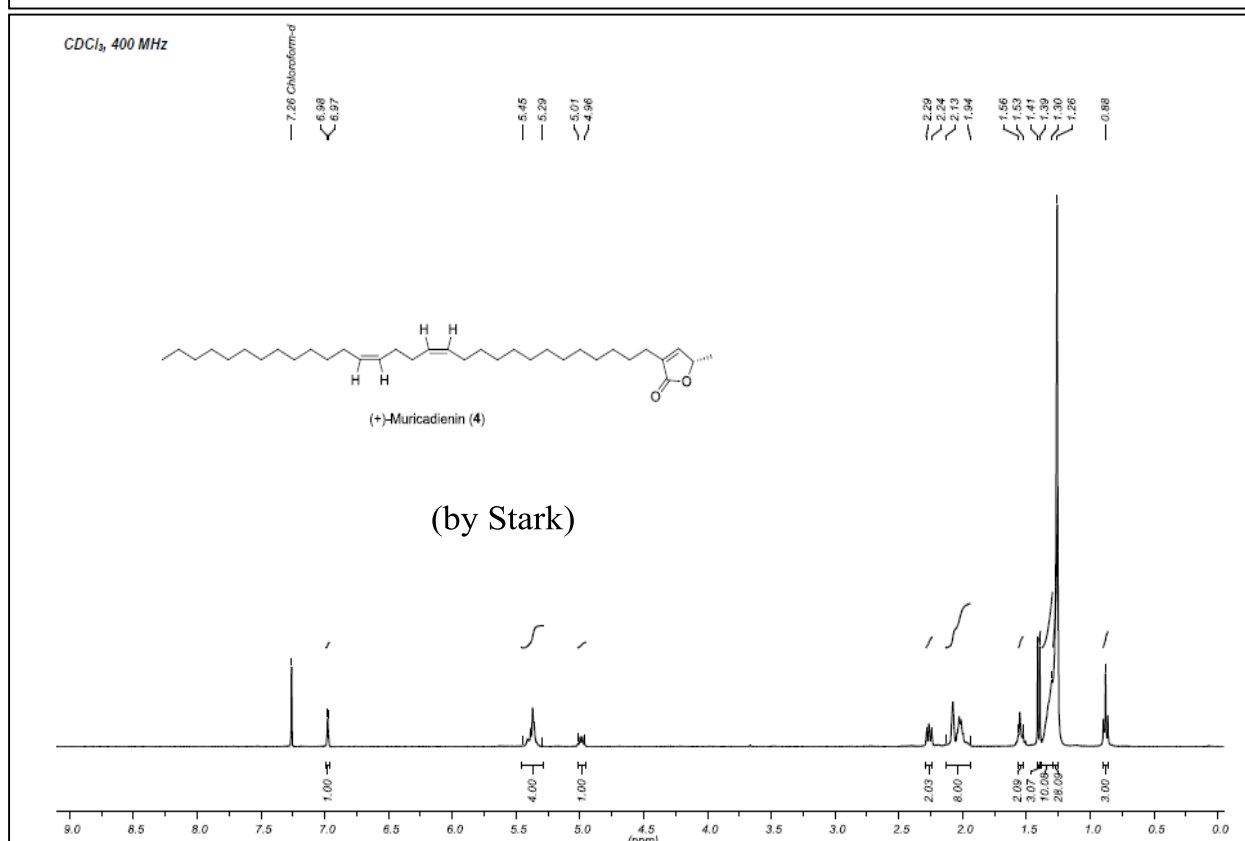



**<sup>13</sup>C NMR (100 MHz, CDCl<sub>3</sub>) and comparison with literature data of compound 2**

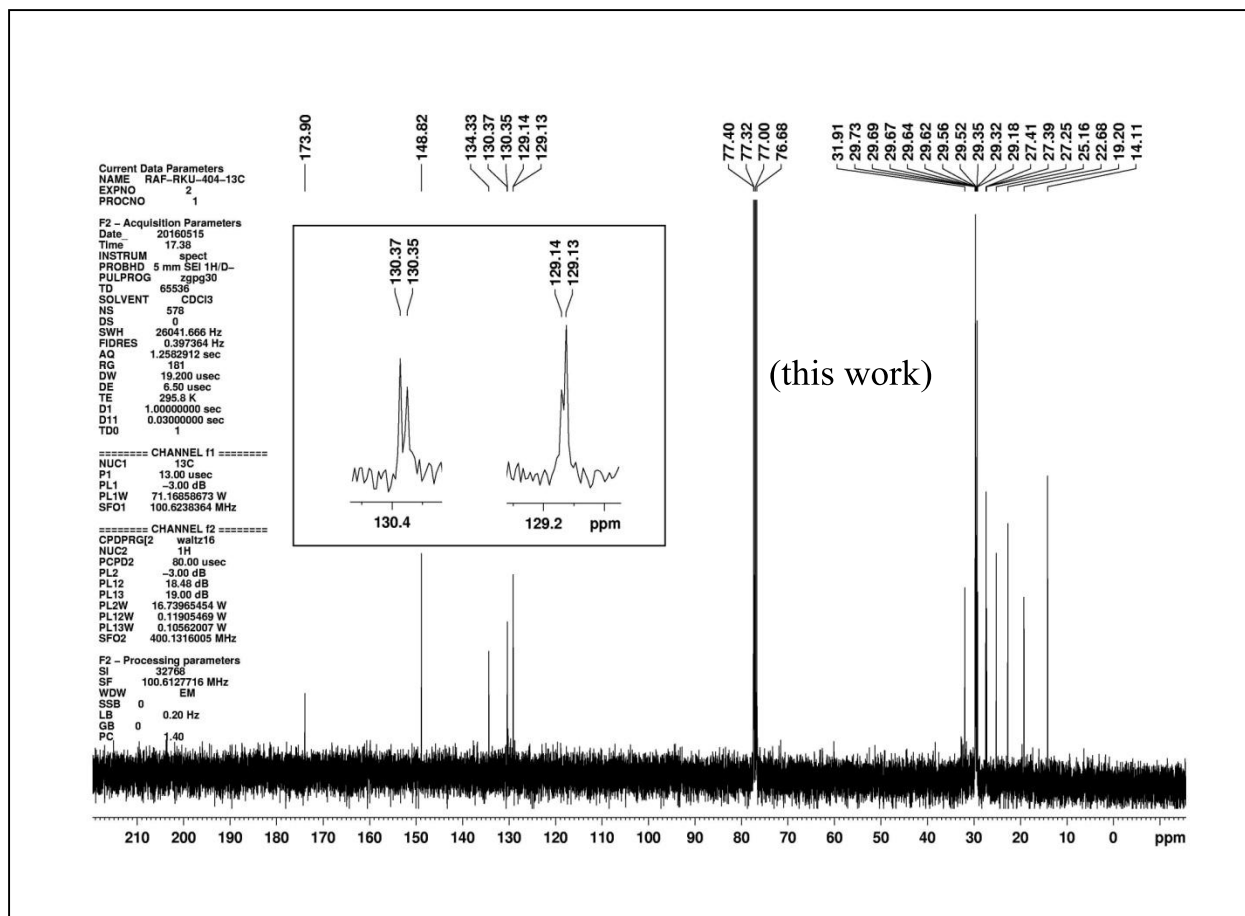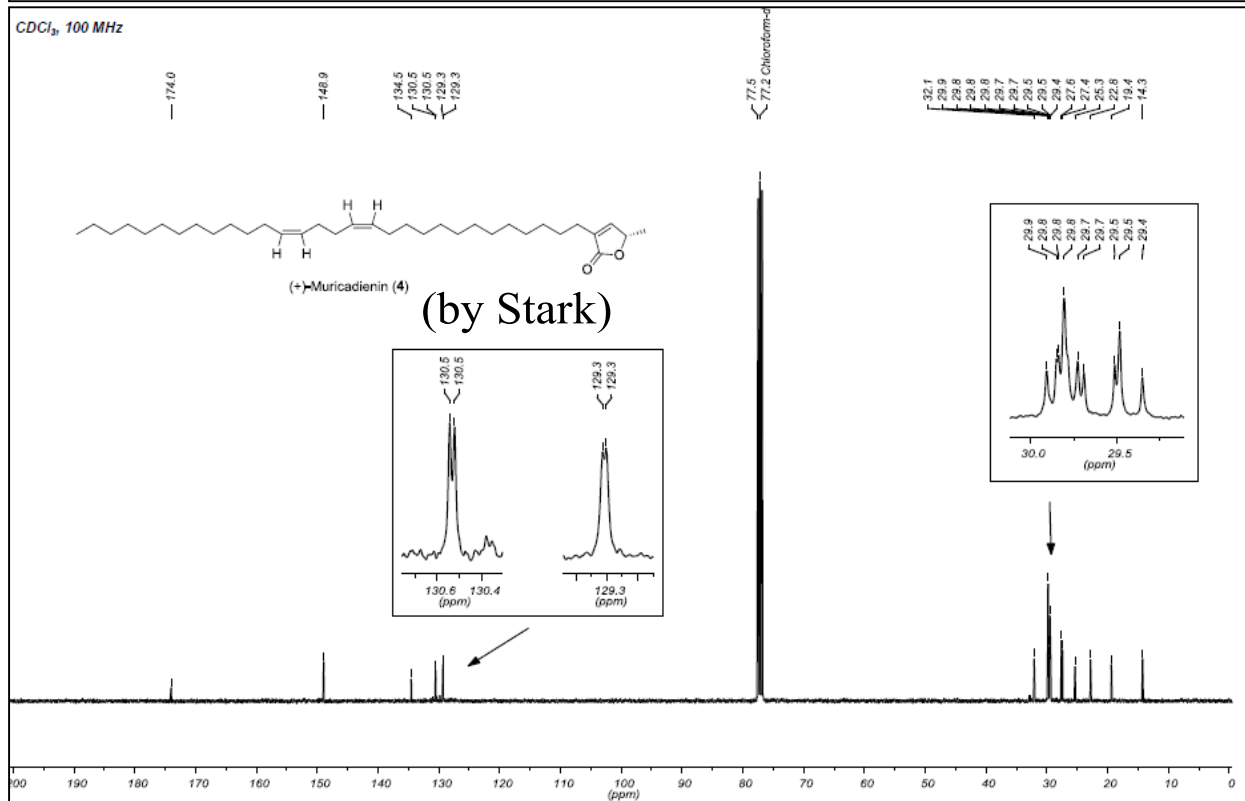

Supplement: c6ob01721e1.pdf [file c6ob01721e1.pdf]
